# Supplementary material for: Broadly neutralizing human antibodies against dengue virus identified by single B cell transcriptomics
Source: eLife journal article supplement (doi:10.7554/elife.52384), 2019-12-10

Figure 5 - figure supplement 1

A

|                         |                                                                 |    |
|-------------------------|-----------------------------------------------------------------|----|
| DENV1_WP_AAN06983.1     | MRCVGVGNRDFVEGLSGATVWDVVLHGGSCVTTMAKDPTDIELLKTVEVTPNPAVLRLKLC   | 60 |
| DENV2_16681_NP_739583.2 | MRC1GMNDRDFVEGLSGSGSVVDL1LEHGGSCVTTMAKNKPTLDLDEL1KTEAKQPATLRKLC | 60 |
| DENV3_C53489_AA869126.2 | MRCVGVGNRDFVBCVSGATVWDVVLHGGCVTTMAKNKPTLD1EL1KQKTEATQATLRKLC    | 60 |
| DENV4_TV360_AAN35835.1  | MRCVGVGNRDFVEGLSGGVAVDL1LEHGGCVTTMAQGKPTLDLDEL1TKTTAKVEALLTRKLC | 60 |
| ZIKV_HFP2013_AH131508.1 | IRCVIGNDRDFVEGMSGCTVWDVVLHGGCVTTMAQDKPTVD1ELVTTVSNMAEVRYSVC     | 60 |
| WNV_NY99_AAD23565.1     | FNCLGMNDRDFVEGLSGVATVWDVL1EGDSCPTIMSKDKPTLDVKVMNMEANLAEVRYSVC   | 60 |
| JEV_S414_AAA21436.1     | FNCLGMNDRDF1EGASGATVWDVVL1EGDSCSLT1MDKDKPTLDVRMIN1EASGLAEVRYSVC | 60 |
| YFV_Asibi_AHB63685.1    | AHCIGITDRDF1EGVGHGCTVWSAT1EQDKCVTTPMAPDKPS1DLSLETVAIDGPAEARKVC  | 60 |
|                         | * * * * *                                                       |    |

|                          |                                                                    |     |
|--------------------------|--------------------------------------------------------------------|-----|
| DENV1_VP_AA06983.1       | TEAKISNTTTFDSRCTGGEATLVEEQDQIVNFCVRRITFVDRGWNCGGCLFGKSGSLIDTCAFKF  | 120 |
| DENV2_16681_NP_739583.2  | LEAKLTNNTTFSRCPCTGEPGLSEHQDKRFVCSHMSVDGNGGCLFGKGGVITVFCAMFR        | 120 |
| DENV3_C543489_AAB69126.2 | IEGKTIINNTTDSRCTGGEALLPEEQDQNVYCKHTITFVDRGWNCGGCLFGKGSGLVTCAFKQ    | 120 |
| DENV4_TV5360_AAK3583.1   | LEASINNTTATATRCPTGGEYLLPEEQDQOYICRRDVPDRGWNCGGCLFGKGGVVTCAFK       | 120 |
| ZIKV_HFP2013_AH313508.1  | YEASISDMASDSTKACPTGGEAYLLQKSDPTQYVCKRTFLVDRGWNCGGCLFGKSGSLIDTCAKFA | 120 |
| WNVI_NY99_ADD23565.1     | VLATSDMDSTKACPTMGEAHNEDRPAFVCRQGVDRGWNCGGCLFGKSGIDTCAKFA           | 120 |
| JEV_SA14_AAA21436.1      | YHVSVDTISVAKNPCTGGAHNKEARDSSYVCKQGFITDRGWNCGGCLFGKSGIDTCAKFS       | 120 |
| YFV_Asiabi_AHB63685.1    | YNASVTLTHVKINDKPCSTGEAHLEAENGDNAKCRITFSDRGWNCGGCLFGKSGIVACAFKT     | 120 |

|                          |                                                                |     |  |
|--------------------------|----------------------------------------------------------------|-----|--|
|                          | ■ ■ ■ ■ ■                                                      |     |  |
| DENV1_WP_AAN06983.1      | CVTKLEGIQVYENLKYSIVTVHTGDO---H-----OVGNETHEGTATITPQPAPTSE      | 172 |  |
| DENV2_16681_NP_739583.2  | KLNMEGVKKVVENLETYIIVTHSGE---H-----AVGNDTGKGHKIKITPPSSITE       | 172 |  |
| DENV3_CH53489_AB869126.2 | CKSTLEGKVQYHENLKYTIVITPHTEGDO---H-----OVGNET-QGVTAIEITPQAISTE  | 170 |  |
| DENV4_TVP360_ANK35835.1  | CSGKITGNLQVIENLEYTVVVVLVHGNGDT---H-----AVGNDTSNHCVTAMITPRSPSVE | 172 |  |
| ZIKV_HFP2013_AHZ13508.1  | CSKMTGKSQFQENLEYRLIMSVHGSQH---SGMVIDNTGHETDENRAKVEITPNPSRAE    | 172 |  |
| WNV1_NY99_AD23565.1      | CTKAIGRTILKENIKYEVAIFVHGPTTVESHGNSYTQVGA---TQAGRFSTIPAAFSYT    | 177 |  |
| JEV_SA14_AA241436.1      | CTSKAIGRTISQPIKIYEGVIFVHGTTTSENHGNSYAQVGA---SQAQKFSTIPNPASIT   | 177 |  |
| YFV_Asibi_AHB63685.1     | CTSKAIGTFVDVDTQIKIQVIRLAQLHVGAKQEKN---N-----DITDKTLFDALSGSQE   | 169 |  |

|                          |                                                                |     |
|--------------------------|----------------------------------------------------------------|-----|
| DENV1_WP_AAN06983.1      | IQLTYDYGALTLDCSPRTGLDFNEMVLLTMEKKSWLVKHQWFLDPLPLPWTSGASTSQETWN | 232 |
| DENV2_16681_NP_739583.2  | AELTYGQVTVMCESPRTGLDFNEMVLLQMNKAWLVRHQWFLDPLPLPWLPGADTQGSNNW   | 233 |
| DENV3_C653489_AAB69126.2 | AILPEYGTGLGECSPRTGLDFNEMILLTNNKNKAVHWFQFDFPLPLPWTSGASTPTGW     | 230 |
| DENV4_TV360_AAN35835.1   | VKLPGYGLTLDCCEPSRGIDFNEMILMKKQKTLWLVKHQWFLDPLPLPWTAGADTSEVHNH  | 231 |
| ZIKV_HFP2013_AH313508.1  | LDLPGSGSLGDLCEPRTGLDFSDLLYYLTMMNNKHVHWFHFDPLPLWHAGADTGPWPHWN   | 237 |
| WNVI_NY99_AAD23565.1     | LKLGEGVEVTDCCEPSRGIDTNAAYVMYVTKGTFVLVHWFMDLNLPWSSAG---STWVR    | 234 |
| JEV_SA14A_22A21436.1     | LKLGIDYGVTLDCCEPSRGILNTEAFVPMVTGSKFLVHWFHDLALPWTSPS---STAWR    | 234 |
| YFV_Asibi_AHB63685.1     | AEFTGYGKATLCQCVQTAQVDFGNSYIAEMEKESWIVDRQWQDITLFPWQSGS---GGVWR  | 226 |

|                           |                                                               |     |
|---------------------------|---------------------------------------------------------------|-----|
| DENV1_WP_AAN06983.1       | RQDLVTVFKTAHAKKQEVLVLSGSEGAHMHTALTGATEIQTSGT---- <td>288</td> | 288 |
| DENV2_16681_NP_739583.2   | KQETLVTFKNPAHKQQDVLVLSGSEGAMHTALTGATEIQMSG-----NLLTFGHLKCLRK  | 289 |
| DENV3_C353489_AAAB69126.2 | RKELLVTFFKNPAHKQEVLVLSGSEGAMHTALTGATEIQNSGG----TISFAGHLKCRKL  | 286 |
| DENV4_TV260_KAN53835.1    | YKERMVTFVDPAHAKRQDVLVLSGSEGAMHSALAGATVESDGD-----NMHFAGHLKCKVR | 288 |
| ZIKV_HFP2013_AHZ13508.1   | NKEALVEFKVAHRKRQTVVVLSGEGAVHTALAGALEAMDGRK--(GR)SSGLSHLCKRLK  | 294 |
| WNV1_NY99_ADD23565.1      | NRETLMEFEPPHAHQSVSLALGSQEGGLHALQAAGAIPEFSNT---VKLTSGHLKCKRV   | 291 |
| YFV_SA14_AAA21436.1       | NRETLMEFEPPAATHQSVSLGSEGGLGHLAGAIAIIVVEYS-S--VKLTSGHLKCRKL    | 290 |
| YFV_Asibi_AHB63685.1      | EMHHVLEFEPPHAATHIRVALGNQEGSKLTKTGAMRVTKDNDNNLYKLHGHSVSCRVK    | 286 |
|                           | * * * * *                                                     |     |

[illegible]

|                          |                                                      |     |
|--------------------------|------------------------------------------------------|-----|
| DENV1_VP_AA06983.1       | NGRLITANPIVDEKE--KPVNIEAEPFGGESYIVVCGEAKALKSKSFFKRG  | 395 |
| DENV2_166861_NP_739583.2 | LGRLITVNPIVETKED--SPVNIEAEPFGGSYIIIGVEPKGLKNWFKKG    | 395 |
| DENV3_CV53489_AA869126.2 | NGRLITANPVPVTKKE--EPVNIEAEPFGGESNIVIGICGDAKLNKWNFKKG | 393 |
| DENV4_TVP360_ANK35835.1  | VGRIISSTPLAENTN--SVTNIELEPPGDSYIVIGVGNLSALTLLHWFKRG  | 395 |
| ZIKV_HFP2013_AHZ13508.1  | NGRLITANPVITESTENSKMMLDDPPGDSYIVIGVEKKLTTHHHWRSG     | 404 |
| WNV1_NY99_ADD23565.1     | VGRLVTNVPFVSVAANAKVLIELEPPGDSYIVVGRGQQLNNHHHWKSG     | 401 |
| JEV_SA14_AAA21436.1      | VGRLVTNVPFVTSANASKVLVEMEPFGDSYIVVGRGQQLNNHHHWKAG     | 400 |
| YFV_Asibi_AHB63685.1     | KGILLVTNPIASTND--DEVLIEVNPPGDSYIIVGTGDSRLTYQHWKGG    | 393 |
|                          | * : : : . * . : : : * : : * : : *                    |     |

B

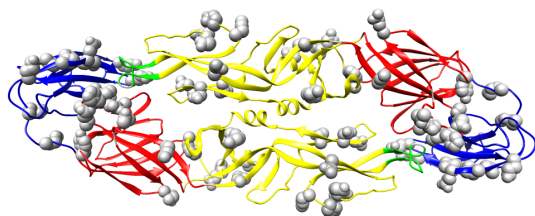

C

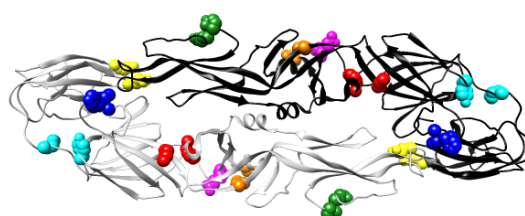

Supplement: supp [file elife-52384-supp-v1.zip › elife_poa_e52384_Figure_5_figure_supplement_1.pdf]
