# Supplementary material for: Broadly neutralizing human antibodies against dengue virus identified by single B cell transcriptomics
Source: eLife journal article supplement (doi:10.7554/elife.52384), 2019-12-10
Supplement: supp [file elife-52384-supp-v1.zip]

Figure 2 - figure supplement 2

A

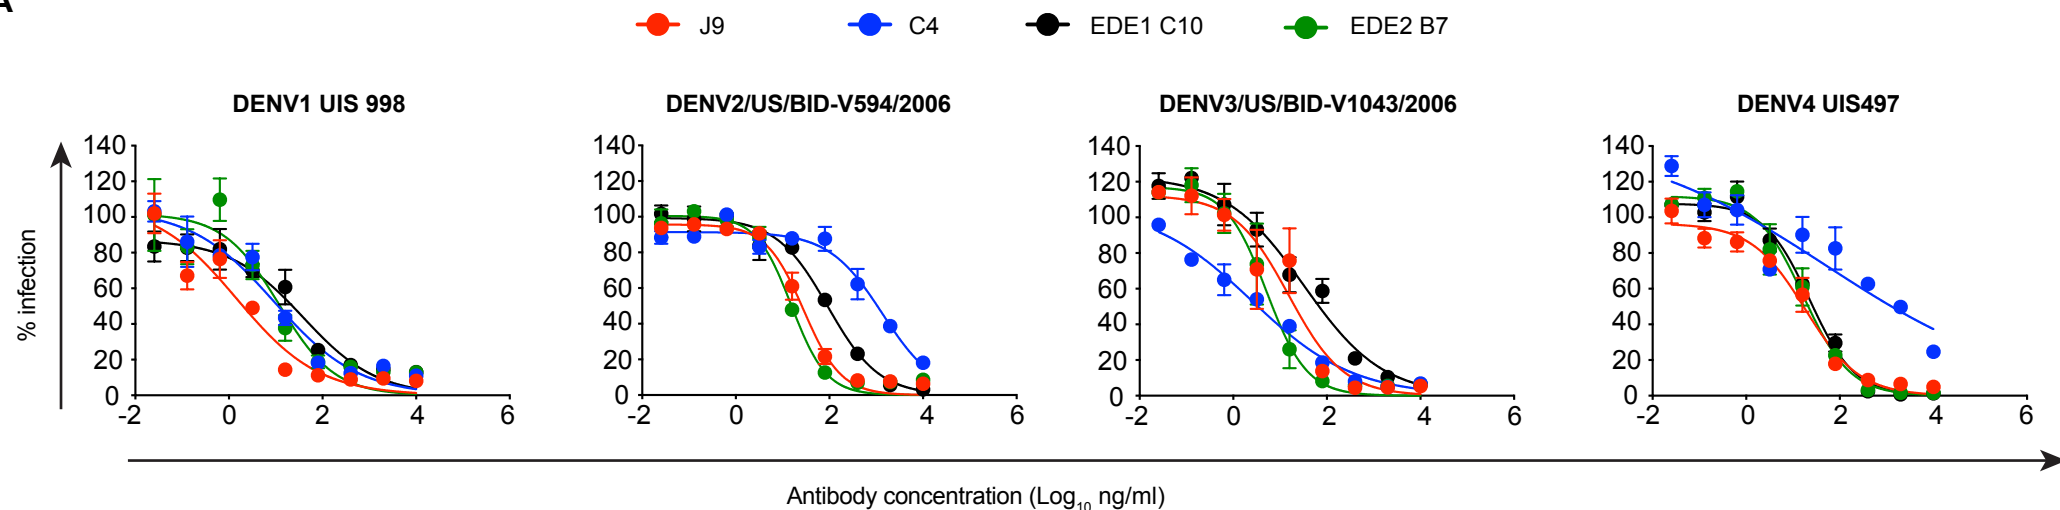

B

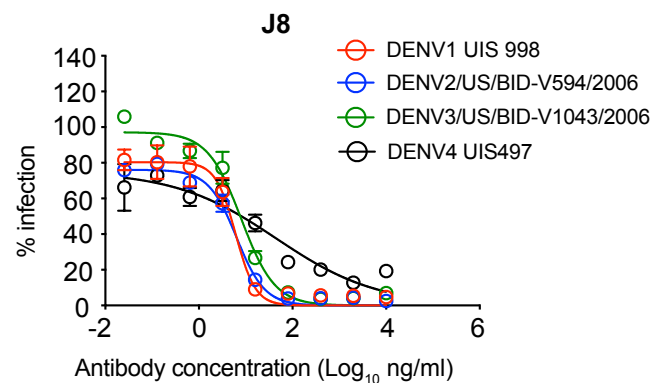

C

|                         | Year | GenBank #             | PMID reference               |
|-------------------------|------|-----------------------|------------------------------|
| <b>Reporter virus</b>   |      |                       |                              |
| DENV1 WP                | 1974 | U88535.1              | 9292016                      |
| DENV2 16681             | 1964 | NC_001474             | 9143286                      |
| DENV3 CH53489           | 1973 | DQ863638              | n/a                          |
| DENV4 TVP360/376        | 1982 | KU513442.1/KC963424.1 | 27267473, 23785205, 26296350 |
| <b>Infectious virus</b> |      |                       |                              |
| DENV1 UIS 998           | 2007 | n/a                   | n/a                          |
| DENV2/US/BID-V594/2006  | 2006 | EU482725              | n/a                          |
| DENV3/US/BID-V1043/2006 | 2006 | EU482555              | n/a                          |
| DENV4 UIS497            | 2004 | n/a                   | n/a                          |
