# Supplementary material for: Broadly neutralizing human antibodies against dengue virus identified by single B cell transcriptomics
Source: eLife journal article supplement (doi:10.7554/elife.52384), 2019-12-10
Supplement: supp [file elife-52384-supp-v1.zip]

Archive with 16 entries (16 files):
- elife_poa_e52384_Figure_2_figure_supplement_4.pdf
- elife_poa_e52384_Figure_2_figure_supplement_1.pdf
- elife_poa_e52384_Figure_5_figure_supplement_1.pdf
- elife_poa_e52384_Figure_6_figure_supplement_1.pdf
- elife_poa_e52384_Figure_1_figure_supplement_1.pdf
- elife_poa_e52384_Figure_6_source_data_1.csv
- elife_poa_e52384_Figure_5_figure_supplement_2.pdf
- elife_poa_e52384_Figure_2_source_data_1.xlsx
- elife_poa_e52384_Figure_7_figure_supplement_1.pdf
- elife_poa_e52384_Figure_2_figure_supplement_2.pdf
- elife_poa_e52384_Figure_5_figure_supplement_4.pdf
- elife_poa_e52384_Figure_3_figure_supplement_1.pdf
- elife_poa_e52384_Figure_2_figure_supplement_3.pdf
- elife_poa_e52384_Transparent_Reporting_File.docx
- elife_poa_e52384_Figure_5_figure_supplement_3.pdf
- elife_poa_e52384_Figure_4_source_data_1.xlsx
