# Supplementary material for: Broadly neutralizing human antibodies against dengue virus identified by single B cell transcriptomics
Source: eLife journal article supplement (doi:10.7554/elife.52384), 2019-12-10
Supplement: supp [file elife-52384-supp-v1.zip]

Figure 1 - figure supplement 1

| Patient ID | Clonal family                | mAb name | VH     |               |                | VL   |               |                | Crude [IgG]<br>(µg/mL) | Fold change in binding |           | % Neutralization |       |       |       |      |     |
|------------|------------------------------|----------|--------|---------------|----------------|------|---------------|----------------|------------------------|------------------------|-----------|------------------|-------|-------|-------|------|-----|
|            |                              |          | Gene   | % nt mutation | CDR3 aa length | Gene | % nt mutation | CDR3 aa length |                        | DENV2 rE               | DENV2 RVP | DENV1            | DENV2 | DENV3 | DENV4 | ZIKV | WNV |
| 020        | 1                            | B10      | 4-39   | 2.68          | 10             | 1-9  | 2.47          | 9              | 3.21                   | 6                      | 12        | 65               | 43    | 64    | 69    | 38   | 11  |
| 013        |                              | M1       | 4-39   | 10.77         | 10             | 1-9  | 1.06          | 9              |                        | 4                      | 13        | 73               | 77    | 65    | 84    | 33   | 47  |
| 020        |                              | D8       | 4-39   | 5.30          | 10             | 1-9  | 2.13          | 9              | 1.77                   | 2                      | 15        | 48               | 41    | 55    | 42    | 28   | 44  |
| 013        | 2                            | M6       | 1-69   | 2.72          | 15             | 1-40 | 4.73          | 11             |                        | 2                      | 1         | -6               | 10    | 36    | 53    | 27   | 36  |
| 013        |                              | H3       | 1-69   | 5.44          | 15             | 1-5  | 3.48          | 10             | 1.26                   | 34                     | 7         | 41               | 72    | 64    | 84    | 0    | 47  |
| 013        | 3                            | P4(405)  | 1-18   | 7.53          | 16             | 2-14 | 1.68          | 10             | <0.0005                | n/a                    | n/a       | n/a              | n/a   | n/a   | n/a   | n/a  | n/a |
| 013        |                              | I13      | 1-18   | 7.53          | 16             | 2-14 | 3.37          | 10             | <0.0005                | n/a                    | n/a       | n/a              | n/a   | n/a   | n/a   | n/a  | n/a |
| 020        | 4                            | I7       | 1-3    | 5.42          | 16             | 1-39 | 7.04          | 9              | 1.65                   | 34                     | 14        | 41               | 67    | 57    | 49    | 13   | 76  |
| 013        | 5                            | C4       | 1-69   | 10.17         | 17             | 1-5  | 2.12          | 8              | 2.47                   | 1                      | 1         | 96               | 74    | 96    | 65    | 22   | 46  |
| 013        |                              | J2       | 1-69   | 10.51         | 17             | 1-5  | 2.47          | 8              | <0.0005                | n/a                    | n/a       | n/a              | n/a   | n/a   | n/a   | n/a  | n/a |
| 013        |                              | N2       | 1-69   | 8.81          | 17             | 1-5  | 2.12          | 8              | 1.97                   | 1                      | 1         | 98               | -10   | 65    | 69    | 3    | 39  |
| 020        | 6                            | L8       | 1-69   | 4.07          | 13             | 1-40 | 0.67          | 12             | 3.93                   | 9                      | 7         | 68               | 81    | 78    | 92    | 28   | 45  |
| 020        |                              | H1       | 1-69   | 4.41          | 13             | 1-40 | 0.67          | 12             | <0.0005                | n/a                    | n/a       | n/a              | n/a   | n/a   | n/a   | n/a  | n/a |
| 013        | 7                            | J8       | 1-69   | 9.86          | 16             | 3-11 | 1.39          | 12             | <0.0005                | n/a                    | n/a       | n/a              | n/a   | n/a   | n/a   | n/a  | n/a |
| 013        |                              | J9       | 1-69   | 10.44         | 16             | 3-11 | 3.83          | 12             | 4.04                   | 1                      | 5         | 100              | 100   | 100   | 100   | 20   | 29  |
| 013        | 8                            | J3       | 1-69   | 9.22          | 17             | 2-14 | 7.22          | 12             | 0.95                   | 1                      | 2         | 97               | 59    | 74    | 40    | 6    | 30  |
| 013        |                              | P4(403)  | 1-69   | 7.51          | 17             | 2-14 | 3.48          | 12             | 2.35                   | 1                      | 1         | 100              | 44    | 78    | 43    | 5    | 25  |
| 013        | 9                            | M11      | 1-69   | 8.45          | 20             | 3-15 | 3.48          | 9              | 4.04                   | 1                      | 2         | 100              | 39    | 59    | 56    | 25   | 49  |
| 013        |                              | M4       | 1-69   | 6.76          | 20             | 3-15 | 2.44          | 9              | 2.54                   | 1                      | 1         | 100              | 1     | 39    | 40    | 5    | 33  |
| 013        |                              | L3       | 1-69   | 5.07          | 20             | 3-15 | 2.44          | 9              | 2.40                   | 1                      | 2         | 100              | 18    | 53    | 53    | 22   | 45  |
| 013        |                              | K11      | 1-69   | 6.08          | 20             | 3-15 | 2.79          | 9              | 3.97                   | 1                      | 1         | 100              | -17   | 47    | 44    | 14   | 33  |
| 013        |                              | O4       | 1-69   | 7.43          | 20             | 3-15 | 2.44          | 9              | 1.74                   | 1                      | 1         | 100              | 0     | 40    | 58    | 5    | 34  |
| 013        | 10                           | I11      | 3-30-3 | 3.08          | 14             | 3-15 | 1.77          | 8              | 1.61                   | 2                      | 3         | 84               | 10    | 31    | 57    | 14   | 22  |
| 013        |                              | C1       | 3-30-3 | 4.11          | 14             | 3-15 | 3.92          | 8              |                        | n/a                    | n/a       | n/a              | n/a   | n/a   | n/a   | n/a  | n/a |
| 013        |                              | G5       | 3-30-3 | 4.80          | 14             | 3-15 | 1.43          | 8              | nc                     | n/a                    | n/a       | n/a              | n/a   | n/a   | n/a   | n/a  | n/a |
| 013        |                              | P2       | 3-30-3 | 5.14          | 14             | 3-15 | 3.90          | 8              | 4.13                   | 1                      | 1         | 96               | 16    | 34    | 49    | 7    | 28  |
| 013        |                              | A7       | 3-30-3 | 10.27         | 14             | 3-15 | 4.26          | 8              | 2.16                   | 1                      | 2         | 97               | 30    | 20    | 55    | 14   | 32  |
| 013        |                              | L9       | 3-30-3 | 5.78          | 14             | 3-15 | 4.26          | 8              | 1.92                   | 39                     | 2         | -16              | 0     | 52    | 78    | 19   | 35  |
| 013        |                              | E9       | 3-30-3 | 8.11          | 23             | 1-40 | 3.43          | 10             | <0.0005                | n/a                    | n/a       | n/a              | n/a   | n/a   | n/a   | n/a  | n/a |
| 013        | 11                           | I8       | 3-30-3 | 8.78          | 23             | 1-40 | 4.45          | 10             | nc                     | n/a                    | n/a       | n/a              | n/a   | n/a   | n/a   | n/a  | n/a |
| 020        | 12                           | E1       | 3-7    | 2.71          | 17             | 8-61 | 2.03          | 10             |                        | n/a                    | n/a       | n/a              | n/a   | n/a   | n/a   | n/a  | n/a |
| 020        |                              | F10      | 3-7    | 4.41          | 17             | 8-61 | 2.70          | 10             | 3.96                   | 2                      | 3         | -28              | -8    | 40    | 63    | 6    | 15  |
| 013        | 13                           | N8       | 4-34   | 7.85          | 18             | 2-14 | 6.49          | 12             | 2.55                   | 1                      | 1         | 99               | 0     | 34    | 61    | 4    | 11  |
| 013        |                              | F4       | 4-34   | 5.12          | 18             | 2-14 | 3.05          | 12             | 1.41                   | 1                      | 1         | 100              | 1     | 48    | 58    | 6    | 20  |
| 020        | 14                           | K2       | 4-39   | 2.34          | 15             | 1-5  | 1.76          | 8              | 2.09                   | 1                      | 1         | -32              | 24    | 44    | 54    | 26   | 39  |
| 020        |                              | A5       | 4-39   | 1.67          | 15             | 1-5  | 1.41          | 8              | 3.63                   | 1                      | 1         | -5               | 23    | 53    | 75    | 20   | 37  |
| 013        | 15                           | P10      | 4-59   | 6.21          | 23             | 1-39 | 2.11          | 8              | 0.72                   | 1                      | 11        | 25               | 68    | 66    | 74    | 27   | 20  |
| 013        |                              | L2       | 4-59   | 7.29          | 23             | 1-39 | 6.43          | 8              | 4.66                   | 1                      | 14        | 10               | 61    | 60    | 61    | 25   | 9   |
| 3H5-1      | DENV2-specific mAb           |          | n/a    | n/a           | n/a            | n/a  | n/a           | n/a            | n/a                    | 44                     | 10        | nd               | nd    | nd    | nd    | nd   | nd  |
| EDE2 B7    | DENV cross-reactive mAb      |          | 3-74   | 6.94          | 26             | 2-23 | 4.51          | 10             | n/a                    | 1                      | 3         | nd               | nd    | nd    | nd    | nd   | nd  |
| EDE1 C10   | DENV/ZIKV cross-reactive mAb |          | 1-3    | 2.78          | 21             | 2-14 | 3.82          | 10             | n/a                    | nd                     | nd        | 100              | 99    | 92    | 100   | 99   | -99 |
| CR4354     | WNV-specific mAb             |          | n/a    | n/a           | n/a            | n/a  | n/a           | n/a            | n/a                    | nd                     | nd        | -127             | -57   | -149  | -139  | -48  | 93  |

| Fold change in binding | % Neutralization |
|------------------------|------------------|
| ≥11                    | 90-100           |
| 5-10                   | 75-89            |
| 2-4                    | 51-74            |
| 1                      | ≤50              |
