# Supplementary material for: Broadly neutralizing human antibodies against dengue virus identified by single B cell transcriptomics
Source: eLife journal article supplement (doi:10.7554/elife.52384), 2019-12-10
Supplement: supp [file elife-52384-supp-v1.zip › elife_poa_e52384_Figure_2_source_data_1.xlsx]

## Sheet: J9_IC50
	Expt_1	Expt_2	Expt_3	Mean	SD
DENV1	2.513	9.437	5.485	5.81167	3.47354
DENV2	15.77	41.01	33.59	30.1233	12.9722
DENV3	4.134	29.84	12.47	15.4813	13.1149
DENV4	33.6	54.88	27.31	38.5967	14.4482
ZIKV	>10000	>10000	>10000
WNV	>10000	>10000	>10000
>10000 = 50% neutralization not observed at highest mAb concentration tested (10,000 ng/ml)

## Sheet: J8_IC50
	Expt_1	Expt_2	Expt_3	Mean	SD
DENV1	3.633	16.78	5.962	8.79167	7.01542
DENV2	3.089	37.52	13.78	18.1297	17.6228
DENV3	7.198	19.87	11.99	13.0193	6.3984
DENV4	18.91	155.9	34.1	69.6367	75.0913
ZIKV	>10000	>10000	>10000
WNV	>10000	>10000	>10000
>10000 = 50% neutralization not observed at highest mAb concentration tested (10,000 ng/ml)

## Sheet: C4_IC50
	Expt_1	Expt_2	Expt_3	Expt_4	Expt_5	Mean	SD
DENV1	96.37	100	74	46	27	68.674	31.7316
DENV2	176.2	546	262	176	150	262.04	164.285
DENV3	58.3	42	nd	22	22	36.075	17.562
DENV4	1760	1094	nd	2191	1451	1624	465.766
ZIKV	>10000	>10000	nd	>10000	nd
WNV	>10000	>10000	nd	>10000	>10000
nd = not determined
>10000 = 50% neutralization not observed at highest mAb concentration tested (10,000 ng/ml)

## Sheet: I7_IC50
	Expt_1	Expt_2	Expt_3	Expt_4	Expt_5	Expt_6	Mean	SD
DENV1	1127	752	1034	2268	3572	nd	1750.6	1170.98
DENV2	nd	nd	nd	712	1350	1363	1031	372.159
DENV3	1294	1413	nd	1160	3218	nd	1771.25	970.021
DENV4	>10000	>10000	nd	>10000	>10000	nd
ZIKV	>10000	>10000	nd	>10000	nd	>10000
WNV	83	nd	nd	417	1359	nd	619.667	661.702
nd = not determined
>10000 = 50% neutralization not observed at highest mAb concentration tested (10,000 ng/ml)

## Sheet: M1_IC50
	Expt_1	Expt_2	Expt_3	Expt_4	Expt_5	Mean	SD
DENV1	1193	164	288	nd	3550	1298.75	1569.35
DENV2	169	104	109	nd	4932	1328.5	2402.51
DENV3	nd	30	398	101	11160	2922.25	5494.15
DENV4	nd	290	285	nd	2811	1128.67	1456.95
ZIKV	nd	>10000	nd	nd	>10000
WNV	nd	>10000	>10000	nd	>10000
nd = not determined
>10000 = 50% neutralization not observed at highest mAb concentration tested (10,000 ng/ml)

## Sheet: B10_IC50
	Expt_1	Expt_2	Expt_3	Expt_4	Expt_5	Expt_6	Mean	SD
DENV1	598	858	1787	212	332	nd	757.4	627.302
DENV2	427	1706	1665	318	528	nd	928.8	694.901
DENV3	800	821	nd	111	631	134	499.4	351.951
DENV4	1539	669	nd	258	326	nd	698	588.814
ZIKV	>10000	>10000	nd	>10000	nd	>10000
WNV	>10000	>10000	nd	>10000	>10000	nd
nd = not determined
>10000 = 50% neutralization not observed at highest mAb concentration tested (10,000 ng/ml)

## Sheet: L8_IC50
	Expt_1	Expt_2	Expt_3	Mean	SD
DENV1	641	249.2	189	359.733	245.437
DENV2	231	201.9	97	176.633	70.4826
DENV3	534	278.1	63	291.7	235.794
DENV4	4570	2695	96	2453.67	2246.74
ZIKV	>10000	>10000	>10000
WNV	>10000	>10000	>10000
nd = not determined
>10000 = 50% neutralization not observed at highest mAb concentration tested (10,000 ng/ml)

## Sheet: EDE1_C10_IC50
	Expt_1	Expt_2	Expt_3	Mean	SD
DENV1	435.7	453.6	165.2	351.5	161.589
DENV2	81.56	279	153.8	171.453	99.8968
DENV3	1106	892.1	260.5	752.867	439.61
DENV4	27.68	71.68	15.35	38.2367	29.6116
ZIKV	17.44	76.41	21.13	38.3267	33.0327
WNV	>10000	>10000	>10000
>10000 = 50% neutralization not observed at highest mAb concentration tested (10,000 ng/ml)

## Sheet: EDE2_B7_IC50
	Expt_1	Expt_2	Expt_3	Mean	SD
DENV1	54.47	126.6	75.3	85.4567	37.1221
DENV2	45.28	86.75	60.2	64.0767	21.005
DENV3	32.05	77.13	27.28	45.4867	27.5075
DENV4	111.1	421.8	86.05	206.317	187.034
ZIKV	>10000	>10000	>10000
WNV	>10000	>10000	>10000
>10000 = 50% neutralization not observed at highest mAb concentration tested (10,000 ng/ml)

## Sheet: CR4354_IC50
	Expt_1	Expt_2	Expt_3	Expt_4	Expt_5	Mean	SD
DENV1	>10000	>10000	>10000	>10000	>10000
DENV2	>10000	>10000	>10000	>10000	>10000
DENV3	>10000	>10000	>10000	>10000	>10000
DENV4	>10000	>10000	>10000	>10000	>10000
ZIKV	>10000	>10000	>10000	>10000	>10000
WNV	6	9	5	5	8	6.6	1.81659
>10000 = 50% neutralization not observed at highest mAb concentration tested (10,000 ng/ml)
