# Supplementary material for: Broadly neutralizing human antibodies against dengue virus identified by single B cell transcriptomics
Source: eLife journal article supplement (doi:10.7554/elife.52384), 2019-12-10
Supplement: supp [file elife-52384-supp-v1.zip › elife_poa_e52384_Figure_4_source_data_1.xlsx]

## Sheet: MAB data
	J9		I7		M1		L8		EDE1 C10		FL
Mutation	Mean	Range	Mean	Range	Mean	Range	Mean	Range	Mean	Range	Mean	Range
M1A	-1.88	4.03	83.48	3.13	47.82	2.18	44.28	6.36	3.77	1.84	86.74	0.01
R2A	9.75	12.31	82.85	3.45	48.96	8.17	54.26	6.33	48.9	15.18	82.39	19.37
C3A	5.46	16.43	36.88	17.1	30.18	2.59	24.2	6.86	-4.1	1.5	49.37	6.62
I4A	-0.5	0.32	119.76	36.39	77.24	14.79	66.85	14.5	68.5	6.01	94.34	0.84
G5A	-3.24	1.63	91.18	2.66	49.35	9	45.7	14.21	-1.52	4.56	86.65	2.76
M6A	89.18	17.17	121.23	39.28	97.54	3.36	96.15	7.97	82.13	9.95	126.45	29.46
S7A	81.65	46.07	127.45	17.66	78.29	8.92	77	14.6	106.3	2.6	111	6.5
N8A	79.02	11.6	60.46	0.25	76.29	12.82	60.26	3.54	98.87	18.62	81.23	14.26
R9A	1.79	12.9	52.26	7.27	36.09	2.98	38.9	8.13	-1.18	1.34	69.71	7.66
D10A	97.23	45.24	132.05	1.92	87.95	27.9	100.29	7.77	119.21	26.87	116.01	4.11
F11A	14	23.74	76.16	77.09					-3.23	17.05	51.08	9.84
V12A	75.29	10.06	90.44	61.66					118.01	4.84	75.96	9.38
E13A	63.1	38.03	78.7	21.62	75.24	4.83	74.22	3.62	89.68	15.78	83.4	5.57
G14A	86.8	44.34	164.22	36.92	85.72	4.7	101.75	2.96	91.78	19.44	86.33	16.09
V15A	90.23	23.45	100.15	13.9	86.06	17.14	94.45	2.35	140.89	18.28	110.98	13.42
S16A	101.36	9.45	149.33	76.23	93.07	27.12	88.91	20.43	134.53	50.65	104.12	6.33
G17A	91.27	2.99	131.94	77.45	81.45	6.78	76.27	24.07	130.18	29.25	98.24	21.91
G18A	131.31	28.96	126.44	24.18	94.11	0.96	120.14	22.94	120.39	33.89	115.93	7.17
S19A	113.32	39.24	116.88	44.84	87.21	11.39	84.81	29.13	107.84	61.84	96.58	16.68
W20A	118.54	44.8	82.55	23.07	65.61	7.37	62.7	18.81	77.21	25.26	99.2	19.04
V21A	58.59	4.26	48.65	3.29	65.73	17.21	64.65	4.24	93.3	23.08	80.65	9.65
D22A	16.93	7.2	13.71	12.87	23.28	1.75	28.21	3.84	34.17	32.77	32.02	1.99
I23A	14.71	3.65	4.95	6.99	8.43	4.55	13.22	4.24	7.43	3.64	26.22	0.75
V24A	66.46	21.72	92.67	0.35	75.66	8.95	79.76	20.92	86.79	40.68	86.02	1.55
L25A	6.28	8.32	-4.72	4.91	1.73	2.95	2.27	0.93	0.77	1.31	13.42	0.63
E26A	73.93	17.57	96.19	24.42	79.85	2.53	79.58	6.23	116.15	22.57	95.35	5.18
H27A	44.22	8.69	73.02	9.81	72.39	22.88	80.17	22.05	80.36	3.17	93.11	9.98
G28A	34.12	1.17	52.63	50.07					67.92	20.97	50	6.39
S29A	129.96	5.62	136.87	9.02	77.39	26.3	87.74	16.37	79.23	17.27	108.02	18.16
C30A	2.14	4.71	26.94	14.32	20.88	7.79	22.91	4.49	-1.4	4.52	42.51	4.54
V31A	46.85	0.86	27.11	7.47	29.98	14.75	36.86	9.05	52.05	14.46	51.13	6.47
T32A	4.46	6.71	6.02	1.02	7.23	4.56	7.36	0.06	-0.8	5.42	20.64	3.32
T33A	118.28	15.74	116.12	15.29	93.38	9.16	95.31	3.26	97.81	56.77	112.05	22.95
M34A	1.86	2.12	34.29	5.13	29.66	5.8	34.49	12.22	3.37	3.48	66.44	6.15
A35S	88.46	21.61	122.42	12.95	71.01	22.33	68.91	7.79	65.56	6.04	99.2	9.61
K36A	120.45	29.42	115.37	17.86	82.88	20.36	83.19	0.66	69.43	0.69	105.54	4.83
N37A	68.37	10.59	67.84	13.63	50.19	9.67	55.84	6.14	66.89	14.29	78.07	6.19
K38A	54.31	6.17	71.3	27.71	54.53	14.82	61.29	1.12	74.81	11.72	77.35	3.81
P39A	2.41	0.75	26.57	7.14	19.06	2.71	22.41	3.91	3.67	3.42	40.71	2.52
T40A	-1.29	0.11	54.61	10.63	36.57	1.5	33.91	0.98	3.77	5.84	61.7	3.73
L41A	-2.81	0.11	1.82	1.49	2.08	1.37	5.33	2.18	-3.77	0.67	15.03	2.34
D42A	4.83	5.65	18.84	0.46	19.08	6.77	19.44	1.09	0.37	2.14	43.41	0.21
F43A	25.24	4.98	6.22	10.31	16.09	8.63	19.31	6.48	22.03	0.24	25.24	1.63
E44A	80.91	4.13	118.45	5.45	87.15	9.15	81.34	5.11	71.93	40.76	101.96	7.28
L45A	-1.82	3.1	-4.88	10.34	0.04	1.65	1.02	0.21	-0.29	4.19	5.66	1.13
I46A	19.14	7.75	25.3	2.66	33.04	6.78	29.87	10.47	44.41	0.33	57.03	7.08
K47A	11.98	8.46	64.14	2.49	56.59	20.49	61.01	0.62	59.72	13.26	84.25	0.89
T48A	54.81	7.04	91.44	20.66	80.39	35.72	80.89	1.15	68.37	15.86	89.33	9.48
E49A	74.14	11.29	68.45	33.27	61.68	15.63	62.31	14.75	85.09	17.08	78.76	4
A50S	54.82	6.49	74.37	43.9	59.72	23.38	59.5	16.83	55.47	15.02	82.92	0.95
K51A	46.47	19.74	44.86	17.12	59.57	11.28	54.48	9.84	57.57	0.34	73.84	2.79
Q52A	108.38	27.35	98.99	40.66	82.22	16.08	106.97	15.63	113.61	62.55	106.36	6.96
P53A	97.95	36.81	170	0.27	89.87	34.77	92.87	2.61	102.16	8.74	123.67	0.55
A54S	90.64	10.46	149.76	6.47	86.6	28.1	89.4	14.66	114.9	13.74	108	0.86
T55A	62.63	30.77	59.55	14.69	45.43	22.8	60.34	5.4	64.41	14.16	84.84	9.4
L56A	15.34	8.89	-4.16	4.9	6.37	3.12	5.43	0.53	13.99	3.6	25.17	0.85
R57A	7.06	1.43	-5.7	7.51	0.17	1.04	3.81	3.88	0.33	1.39	8.09	4.43
K58A	52.52	20.39	30.24	0.57	32.78	16.15	31.15	2.61	60.09	5.2	58.17	3.02
Y59A	-1.82	2.15	-5.07	6.76	-0.07	1.69	1.72	2.11	-3.28	0.41	5.22	1.2
C60A	-2.94	0.08	-4.91	6.98	-0.63	1.53	1.23	0.95	1.53	4.02	2.04	1.08
I61A	2.65	7.44	-4.32	4.41	0.08	2.63	2.08	2.96	-0.39	4.66	5.96	1.15
E62A	79.34	35.85	76.1	1.21	63.01	25.42	54.41	13.88	72.88	2.21	94.23	3.58
A63S	31.03	12.57	6.06	9.37	5.78	2.19	7.73	4.53	14.46	1.06	31.05	4.89
K64A	149.15	5.68	185.68	4.15	99.66	10.62	116.13	26.65	130.49	20.22	130.16	8.08
L65A	80.33	43.77	37.12	11.41	53.98	11	59.28	9.03	64.23	4.16	71.88	8.47
T66A	54.78	15.29	49.49	10.69	53.3	18.88	58.19	11.7	93.15	4.85	77.58	7.26
N67A	37.85	2.37	12.18	6.93	20.21	1.77	18.9	0.37	62.35	0.12	37.25	0.92
T68A	90.41	60.82	109.39	8.64	75.7	32.01	80.41	8.7	93.18	17.65	90.01	4.21
T69A	58.03	4.99	34.56	11.09	30.08	6.11	33.67	3.77	86.35	0.66	45.09	0.62
T70A	41.89	6.58	36.23	9.9	27.04	8.32	30.83	1.24	61.07	16.14	51.66	3.07
E71A	148.6	89.29	182.45	53.9	93.96	21.84	112.38	11.73	161.88	21.13	109.78	20.78
S72A	118.63	0.2	122.46	11.73	80.3	20.35	87.5	8.96	114.47	32.36	103.84	6.22
R73A	91.78	40.41	124.19	21.8	85.58	23.07	78.49	15.75	71.46	6.62	104.37	2.87
C74A	1.32	2.47	1.13	4.3	-1.58	1.39	0.32	0.43	4.4	9.01	0.47	0.38
P75A	11.03	1.78	75.03	15.7	11.21	4.23	29.17	12.78	4.02	3.87	39.17	6.64
T76A	132.25	44.98	138.29	9.57	116.39	11.02	103.85	11.26	146.74	41.91	118.4	3.12
Q77A	109.29	38.29	116.57	20.31	64.56	7.69	75.24	6.54	72.1	28.08	103.47	21.47
G78A	67.25	16.23	51.81	10.75	45.84	20.57	58.57	10.62	44.16	8.85	82.24	1.48
E79A	0.25	1.62	-1.81	8.77	-0.07	5.07	0.39	0.21	-0.95	1.34	2.82	0.86
P80A	80.17	32.56	91.67	9.45	53.87	5.26	60.42	13.73	79	37.74	70.11	3.79
S81A	109.9	38.03	105.93	9	75.65	6.21	80.18	24.6	92.19	10.33	99.03	19.37
L82A	39.52	10.64	40.86	12.85	11.56	7.65	23.15	4.61	57.12	11.36	45.14	4.63
N83A	118.7	1.87	195.01	36.92	100.26	5.03	113.54	6.55	150.98	66.13	130.3	46.98
E84A	63.87	18.13	79.19	35.05	58.63	15.65	73.92	29.34	65.03	29.75	82.97	20.5
E85A	25.23	12.69	30.42	1.58	15.98	3.41	22.02	4.71	29.08	3.81	42.49	3.54
Q86A	70.58	8.33	90.4	21.45	104.14	7.54	91.01	18.92	71.66	58.63	109.17	8.48
D87A	-2.25	2.21	-1.76	0.14	-1.38	1.83	1.72	0.82	-0.32	3.4	5.93	0.46
K88A	105.77	11.74	137.81	52.44	112.67	3.86	107.7	7.83	108.45	11.99	105.88	1.05
R89A	73.98	12.14	42.49	0.64	43.63	3.59	41.86	2.8	88.76	5.68	78.89	20.32
F90A	7.45	8.74	8.64	3.05	3.97	2.5	6.7	0.98	7.04	7.57	21.35	0.77
V91A	52.84	20.66	13.97	7.75	15.64	2.02	16.1	3.7	41.02	22.22	45.47	2.13
C92A	1.06	9.52	3.06	0.66	-1.63	1.69	0.33	0.25	-5.68	0.02	2.92	2.98
K93A	137.32	24.16	62.93	3.4	73.12	2.91	77.78	10.11	93.06	43.87	92.66	14.28
H94A	33.27	12.06	30.43	5.8	17.56	6.19	19.97	1.77	30.91	18.17	39.68	3.32
S95A	53.73	14.41	97.99	22.87	71.76	6.16	84.01	19.13	115.5	25.96	101.74	4.33
M96A	90.25	2.25	69.6	10.71	75.11	13.82	83.49	6.22	59.59	0.79	86.33	3.58
V97A	41.64	14.85	49.44	14.84	46.45	21.13	48.69	5.95	74.41	14.47	71.86	5.08
D98A	0.95	3.17	49.81	3.13	24.86	7.67	32.7	0.19	9.75	3.98	62.08	3.72
R99A	4.8	2.22	72.65	71.3					-7.02	9.33	58.07	6.85
G100A	1.91	0.8	73	57.5					5.35	22.58	35.82	8.26
W101A	-2.71	1.48	69.91	8	-0.57	1.24	4.07	6.6	-3.52	1.04	3.71	3.73
G102A	-0.26	4.23	85.07	30.68	68.82	14.22	50.35	3.69	102.04	34.41	97.1	7.84
N103A	-2.64	3.18	23.63	4.43	2.2	2.49	8.16	3.04	-3.03	8.05	24.82	1.3
G104A	25.6	3.08	33.28	4.14	12.05	1.93	16.29	5.18	1.96	3.55	34.97	7.11
C105A	-0.88	7.43	5.94	4.68	0.03	1.25	0.96	0.65	-3.22	0.91	4.08	0.18
G106A	161.38	61.74	189.16	12.24	9.79	2.8	111.39	16.93	172.26	11.57	130.36	2.63
L107A	103.08	37.09	122.86	9.18	100.92	19.77	113.82	2.94	105.1	20.69	113.12	9.07
F108A	-0.15	5.61	78.1	3.91	-1.55	1.36	13.28	18.08	-2.85	0.61	101.65	7.35
G109A	43	10.24	49.63	1.46	21.58	5.92	29.24	3	34.28	9.36	41.27	0.42
K110A	45.02	0.9	83.23	14.72	55.07	1.86	50.69	4.49	50.39	0.86	69.4	8.21
G111A	51.02	28.26	84.63	31.48	37.18	7.29	66.72	6.55	65.06	0.41	76.39	7.88
G112A	100.66	31.14	169.45	82.01	116.17	8.45	96.23	0.5	126.44	52.02	123.99	7.15
I113A	47.75	4.52	43.99	21.25	28.86	11.01	37.07	13.34	72.83	22.3	59.05	9.83
V114A	32.94	12.21	19.56	10.69	13.99	1.29	20.19	11.69	29	28.01	39.3	3.52
T115A	6.14	5.23	4.44	8.25	10.5	7.65	10.24	1.02	14.86	2.47	34.53	0.31
C116A	0.05	6.23	-2.32	9.69	-0.49	2.41	1.25	2.62	-2.09	3.28	1.87	1.72
A117S	93.39	10.05	84.8	7.16	73.09	2.93	81.65	0.19	75.6	37.48	104.24	3.14
M118A	63.43	5.83	52.51	3.17	38.52	8.16	41.61	0.78	85.41	0.52	63.94	22.63
F119A	-0.12	0.88	-6.74	5.6	0.53	2.31	-0.41	0.51	-2.45	2.52	2	1.65
R120A	126.84	49.98	84.83	5.81					96.67	18.85	136.26	20.61
K123A	88.41	4.62	66.91	82.75					82.35	9.75	76.56	20.01
N124A	109.87	53.64	209.86	61.4	138.68	38.67	130.63	0.04	116.21	62.04	153.21	8.06
M125A	60.13	10.92	59.31	16.61	45.11	11.2	46.87	10.01	78.08	5.37	70.54	0.92
E126A	99.53	28.99	83.91	6.09					58.21	19.62	100.84	20.83
G127A	50.94	12.95	13.07	6.05	17.21	10.06	19.82	6.1	48.19	13.76	40.82	1.17
K128A	93.62	16.3	68.33	6.69	53.53	8.61	63.39	14.14	60.47	15.63	84.07	2.51
V129A	54.47	3.09	75.03	22.23	59.84	16.35	68.2	8.64	77.03	37.29	71.6	3.05
V130A	49.25	5.77	16.86	5.45	20.64	9.08	30.36	8.06	48.39	5.58	50	5.23
Q131A	110.19	8.87	113.02	25.62	96.11	2.77	88.45	4.13	138.74	86.44	132.06	16.44
P132A	112.63	37.4	118.32	20.11	74.01	14.2	84	14.55	87.16	15.23	97.56	11
E133A	89.22	13.62	68.89	11.32	78.85	3.35	73.8	32.14	92.28	36.71	106.12	1.88
N134A	101	60.82	67.88	7.03	59.43	1.67	65	16.11	84.92	40.18	97.37	4.41
L135A	48.06	30.03	24.95	2.46	24.9	10.7	23.66	11.53	19.12	4.02	51.94	4.81
E136A	81.27	24.4	36.58	5.89	48.31	18.61	51.45	19.64	38.73	7.83	56.62	2.03
Y137A	9.56	0.38	3.07	7.77	14.63	5.24	15.35	2.35	9.82	6.85	30.21	2.19
T138A	21.14	1.03	14.69	0.16	17.61	8.68	18.86	3.97	19.99	3.93	36.53	2.85
I139A	11.58	4.61	6.6	8.52	7.3	4.67	8.73	0.39	11.07	5.5	18.05	4.27
V140A	100.32	32.11	158.76	50.68	101.16	17.72	111.65	7.18	143.16	34.48	118.17	0.36
I141A	48.78	1.97	33.04	16.39	35.93	8.77	37.29	12.02	60.54	31.04	52.31	1.49
T142A	74.76	14.91	82.65	34.69	62.17	0.7	73.23	13.08	76.13	22.27	86.77	5.09
P143A	46.93	9.54	66.15	21.35	51.24	17.88	50.71	15.26	55.94	4.81	75.31	15.24
H144A	17.23	8.82	39.38	33.11					28.8	6.11	54.03	6.14
S145A	11.34	2.16	82.37	0.84	69.22	34.6	64.84	7.64	66.71	23.3	91.12	3.65
G146A	-3.11	0.73	58.84	9.38	50.6	6.77	44	8.23	18.89	3.33	82.5	0.18
E147A	115.33	35.84	124.88	5.27	83.81	11.51	81.1	15.17	107.75	9.75	113.13	5.02
E148A	85.96	24.71	132.43	50.96	75.3	17.99	76.66	1.82	88.3	3.57	98.39	15.75
H149A	12.29	10.11	106.8	0.82	84.3	47.22	73.89	6.01	68.92	27.46	115.41	0.78
A150S	121.28	39.27	124.61	14.86	101.38	23.03	88.6	1.89	128.93	24.92	106.76	6.69
V151A	4.59	0.99	96.2	5.47	61.39	6.51	55.89	12.6	43.23	1.47	96.44	1.96
G152A	-3.12	0.95	59.42	0.71	52.33	17.11	53.5	7.88	24.34	11.27	88.86	2.43
N153A	-0.03	8.65	67.14	20.34	48.19	9.47	52.96	18.68	61.29	14.63	63.95	9.37
D154A	90.95	36.32	119.52	5	94.73	16.96	107.84	11.15	79.67	5.72	111.23	7.91
T155A	-5.14	0.56	42.72	5.36	52.79	10.78	50.26	7.33	81.14	2.98	63.03	5.72
G156A	98.13	63.44	98.77	6.63					79.26	2.24	112.06	3.48
K157A	139.78	1.02	105.62	7.4	83.23	5	92.98	7.57	116.32	31.15	112.87	6.48
H158A	54.87	1.66	86.33	3.87	71.01	3.1	69.42	3.79	136.02	12.09	105.82	6.76
G159A	53.85	17.92	149.86	6.57	79.44	1.64	94.18	3.82	80.39	18.09	105.1	17.47
K160A	130.63	9.41	161.71	1.75	102.9	18.05	106.43	2.07	66.62	2.87	129.98	8.42
E161A	96.22	34.93	85.24	2.73	84.88	28.47	79.72	0.89	135.63	13.79	106.24	6.6
I162A	34.87	17.1	22.48	17.87	26.33	12.9	29.84	8.43	51.34	8.21	49.16	4.12
K163A	45.12	36.62	38.18	19.98	36.22	13.48	47.78	2.56	64.82	6.17	57.6	2.8
I164A	6.2	1.45	2.79	10.78	4.25	2.88	7.08	3.3	0.92	2.9	18.02	1.58
T165A	61.96	11.09	56.27	1.68	46.63	21.45	47.44	11.24	51.17	7.57	72.87	4.85
P166A	135.63	82.67	176.61	15.02	93.52	15.65	106.4	28.76	115.76	30.7	128.64	13.19
Q167A	137.62	76.47	128.98	15.08	77.48	34.74	89.99	13.65	88.47	10.37	96.98	3.55
S168A	95.89	28.73	127.47	20.78	82.19	32.53	80.64	25.15	130.89	66.98	102.27	12.16
S169A	109.11	44.85	111.14	3.34					70.01	63.09	120.53	9.24
I170A	103.88	47.19	102.66	32.09	82.03	17.31	83.27	31.95	118.11	44.85	100.25	8.93
T171A	114.46	30.26	142.23	35.9	100.88	32.47	103.47	15.25	150.13	49.19	143.53	1.18
E172A	93.87	59.1	77.27	33.29	64.83	13.24	68.78	19.51	72.07	36.62	90.9	11.11
A173S	57.34	28.42	49.53	15.71	47.23	13.17	51.91	8.99	69.36	26.79	69.66	2.77
E174A	93.65	3.31	103.35	13.69	75.61	28.71	64.47	18.3	123.26	11.73	91.35	8.1
L175A	-0.34	1.04	-3.27	7.38	2.46	2.31	4.51	3.29	-0.74	3.11	13.98	0.46
T176A	119.6	54.58	125.14	43.59	94.75	16.26	82.61	12.91	112.08	17.26	119.96	14.67
G177A	24.59	21.98	23.45	5.64	27.8	4.78	29.8	5.89	30.48	6.28	49.57	0.8
Y178A	12.34	1.12	9.48	7.18	16.35	3.39	14.73	4.56	24.42	5.19	35.02	4.79
G179A	20.36	0.61	22.61	12.04					6.12	7.1	33.07	0.01
T180A	115.7	22.2	81.53	9.14	70.01	17.31	83.33	15.41	68.08	33.35	99.15	3.64
V181A	71.05	43.9	32.31	22.45	49.67	13.08	54.87	3.49	60.68	8.8	59.04	1.52
T182A	116.56	26.16	119.06	36.16	82.19	33.38	91.82	26.55	119.63	6.79	119.35	10.21
M183A	35.71	18.65	32.23	3.48	39.28	12.42	44.56	6.29	83.1	9.65	54.21	4.78
E184A	88.15	26.45	101.68	29.15	81.25	15.37	63.2	22.93	108.64	15.85	84.41	8.86
C185A	5.67	7.32	-3.25	2.6	0.64	1.63	1.99	0.13	-3.76	0.11	5.88	0.97
S186A	63.17	16.61	109.21	2.13	73.86	16.62	82.99	22.09	108.61	45.55	103.51	3.55
P187A	91.41	45.68	121.26	32.51	97.13	23.83	87.43	20.77	133.69	8.14	100.67	3.82
R188A	85.75	21.08	110.64	55.77	94.4	27.22	99.49	26.48	111.64	37.89	111.93	12.47
T189A	73.69	22.59	136.11	21.51	95.24	17.32	90.93	19.44	110.86	36.42	111.22	2.55
G190A	77.68	0.48	122.53	5.67	87.19	34.09	97.77	20.2	128.87	4.69	120.15	0.19
L191A	103.45	5.36	91.21	29.57					77.21	5.32	80.99	16.13
D192A	43.5	0.75	36.62	11.79	35.46	5.04	40.03	13.59	42.77	14.93	67.33	7.96
F193A	66.54	0.38	54.12	6.05	52.47	9.71	55.63	23.27	90.69	26.29	75.22	20.42
N194A	92.71	5.13	97.37	36.06	91.09	30.65	80.16	14.67	108.22	21.88	93.19	0.98
E195A	87.52	44.6	60.89						38.82	6.8	64.67	15.26
M196A	100.29	24.36	75.94	34.73	57.46	25.25	55.43	14.48	50.76	36.03	91	11.01
V197A	19.9	22.04	7.26	0.81	11.48	4.72	16.1	0.59	18.72	3.62	43.94	4.96
L198A	66.67	21.47	122.67	40.11	133.52	25.9	120.83	12.05	173.64	53.67	141.03	11.58
L199A	73.09	16.18	75.52	4.49	44.35	7.31	47.71	14.81	71.56	2.45	75.64	13.79
Q200A	60.76	22.22	54.95	5.71	46.79	13.8	50.05	16.22	87.25	7.23	81.09	13.38
M201A	46.83	19.13	38.28	10.14	24.04	4.59	27.9	8.37	57.84	14.54	54.79	10.79
E202A	79.43	12.66	121.09	2.04	91.15	17.97	81.21	0.5	87.43	31.36	97.29	1.34
N203A	52.56	10.54	37.09	9.87	40.01	0.59	42.99	9.07	68.31	2.6	59.55	9.83
K204A	96.05	10.22	20.37	3.77	43.22	13.63	46.16	11.09	100.24	8.26	63.02	0.28
A205S	96.25	3.44	74.12	12.14					80.85	8.89	91.85	37.52
W206A	36.78	12.12	-2.73	6.27	15.07	5.22	19.42	4.59	45.89	16.64	33.84	12.49
L207A	92.52	52.26	97.6	11.46	76.35	15.25	73.81	23.16	86.19	44.05	99.5	17.24
V208A	36.68	14.64	22.25	25.96	31.83	13.69	26.51	7.19	35.05	1.08	44.97	2.15
H209A	90.53	4.98	90.29	35.27	79.47	15.67	76.83	11.71	95.67	17.97	96.15	10.28
R210A	42.38	2.65	39.29	3.81	30.89	7.13	27.86	5.75	25.55	2.65	52.26	9.3
Q211A	86.85	21.48	71.48	10.81	67.33	5.46	80.72	15.03	117.13	32.96	96.27	0.85
W212A	25.49	3.9	-2.24	2.18	27.07	6	35.3	10.88	58.16	3.5	48.46	7.11
F213A	15.79	2.02	0.79	8.85	8	3.3	8.8	2.5	24.12	1.17	29.62	4.8
L214A	57.79	2.7	3.94						44.06	9.05	21.85	5.51
D215A	33.98	66.43	29.52	17.04					63.57	12.05	61.75	12.59
L216A	-3.41	0.23	-0.78	16.23	-0.58	2.65	0.51	0.19	3.47	9.28	5.25	0.6
P217A	105.23	19.8	153.67	10.28	80.6	13.32	96.2	17.48	68.7	51.12	83.26	24.87
L218A	1.27	3.9	-1.19	2.53					-11.6	8.06	0.54	0.74
P219A	5.15	1.5	10.86	18.83	2.48	7.2	1.22	0.01	-1.98	3.55	12.67	0.94
W220A	7.12	2.28	-2.46	7	2.24	2.61	1.87	0.37	0.86	3.88	10.59	2.1
L221A	79.65	7.72	84.19	6.22	66.63	15.68	51.43	48.43	77.08	48.35	92.52	3.69
P222A	46.52	88.5	123.25	70.41					80.45	2.54	84.4	9.88
G223A	75.37	10.49	53.09	12.24	70.12	7.98	75.76	4.63	54.52	3.58	86.34	11.42
A224S	85.05	6.86	167.44	13.13	120.66	20.06	108.82	7.08	105.94	58.03	112.13	2.7
D225A	50.28	11.59	67.42	8.45	72.59	22.19	72.65	22.28	66.69	10.38	79.76	18.97
T226A	92.7	26.4	109.82	46.99					116.31	21.75	88.44	16.24
Q227A	89.77	58.52	93.62	1.98	90.35	27.16	93.82	19.93	92.28	60.59	107.03	5.67
G228A	94.2	15.61	84.31	6.38	86.73	12.35	81.78	13.74	93.93	40.84	98.72	5.8
S229A	83.75	74.74	112.73	9.5	94.5	37.37	95.44	19.17	77.33	27.77	138.28	21.31
N230A	117.69	64.76	80.15	9.03					98.06	17.97	80.07	0.95
W231A	-0.83	1.99	-1.15	0.72					-4.77	7.93	-0.5	1.57
I232A	81.42	163.38	85.79	49.45					81.98	38.17	86.22	33.89
Q233A	124.49	69.78	146.93	76.59					85.07	2.07	91.39	3.08
K234A	116.95	106.56	87.14	8.16					63.41	11.84	88.35	18.58
E235A	30.15	61.83	39.95	67.59					36.9	3.37	27.91	1.33
T236A	95.75	31.24	95.89	21.85					72.86	19.2	89.75	53.06
L237A	88.62	36.2	51.28	99.67					39.33	22.79	31	4.55
V238A	24.06	48.4	30.68	50.53					51.07	3.23	38.42	9.74
T239A	63.13	126.87	127.47	74.21					59.38	55.33	113.96	25.74
F240A	34.31	70.14	44.86	71.21					28.99	21.13	20.39	3.06
K241A	54.59	103.59	95.9	55.99					73.15	14.4	94.59	20.8
N242A	2.01	6.45	139.49	19.09					85.26	28.47	107.13	4.27
P243A	97.37	13.16	110.9	83.55					83.88	26.28	74.11	17.57
H244A	68.28	12.27	82.37	11.17					80.4	7.85	59.62	2.03
A245S	96.75	2.61	87.57	4.49					103.82	19.97	79.73	16.37
K246A	55.6	22.21	98.1	39.31					108.38	26.66	117.68	45.74
K247A	104.42	34.61	118.04	0.59					106.18	11	88.76	16.87
Q248A	74.13	9.65	78.18	71.21					71.73	14.28	55.93	13.27
D249A	84.23	35.5	74.24	35.73					62.61	20.7	83.02	10.63
V250A	118.02	34.1	75.17	26.31					77.99	24.98	72.02	13.26
V251A	129.58	32.56	119.35	39.3					109.53	43.38	100.18	18.02
V252A	100.88	3.68	135.27	78.97					102.31	11.51	132.83	33.6
L253A	114.17	3.03	85.2	18.55					56.8	6.96	91.47	18.8
G254A	76.5	14.51	84.02	25.79					86.13	29.33	84.2	3.91
S255A	53.91	23.71	16.15	11.91					40.88	0.83	43.12	16.2
Q256A	88.5	22.4	6.43	8.79					59.79	44.53	70.55	9.55
E257A	100.77	18.55	74.2	3.37					72.61	5.92	73.28	13.74
G258A	54.25	17.16	92.28	38.49					55.48	0.23	89.58	18.86
A259S	93.36	22.08	60.83	1.99					60.17	6.82	68.83	2.27
M260A	18.3	7.46	45.87	84.44					5.76	11.38	14.97	8.08
H261A	109.1	27.64	77	32.02					60.22	1.37	82.43	16.02
T262A	61.3	96.96	97.54	48.78					141.02	3.37	107.77	37.3
A263S	68.62	51.35	51.05	55.66					63.91	0.06	62.36	13.98
L264A	40.16	1.27	-3.03	0.77					20.78	16.3	24.95	10.23
T265A	98.74	32.05	34.14	66.75					115.41	99.48	128.78	31.11
G266A	70.22	25.33	3.35	3.97					97.33	0.8	81.9	3.2
A267S	88.54	1.61	71.79	46.3					94.12	13.19	83.83	30.99
T268A	105.66	18	80.12	47.36					82.24	5.6	83.72	24.04
E269A	63.58	5.08	75.56	46.6					82.72	27.01	76.83	29.03
I270A	115.72	41.78	64.03	26.54					94.65	2.54	94.05	13.25
Q271A	97.67	70.34	74.7	22.42					129.68	21.94	92.24	26.81
M272A	73.43	17.38	64.92	21.12					146.35	17.79	97.34	29.29
S273A	112.4	9.52	99.45	18.41					86.66	26.96	99.8	31.59
S274A	103	13.22	73.96	4.7					85.18	19.15	96.72	16.08
G275A	134.87	19.51	65.78	35.4					90.39	0.47	56.76	8.45
N276A	128.22	7.1	76.03	28.45					108.47	16.6	95.92	50.88
L277A	55.87	46.21	96.52	10.12					110.75	90.01	127.3	10.75
L278A	43.85	35.49	126.17	54.92					92.46	19.19	96.47	11.19
F279A	28.34	15.23	76.34	31.09					85.75	77.73	69.71	18.66
T280A	51.92	30.78	112.95	37.16					130.21	19.3	127.33	19.2
G281A	7.54	0.46	82.99	99.57					43.12	36.31	47.7	19.53
H282A	104.41	14.61	128.32	53.61					142.48	4.19	129.87	31.9
L283A	36.26	17.91	51.72	48.11					46.48	0.69	69.09	23.11
K284A	77.31	4.04	80.01	4.8					58.09	33.05	84.34	21.02
C285A	2.91	7.95	37.05	79.77					30.21	57.66	3.76	1.68
R286A	68.13	29.94	47.38	56.27					53.72	1.69	37.27	1.07
L287A	123.97	7.66	58.62	2.15					102.29	8.35	98.14	11.86
R288A	72.51	26.75	61.62	16.8					94.3	13.75	60.06	29.39
M289A	22.69	0.88	17.96	12.75					12.02	4.42	28.58	2.59
D290A	64.36	1.35	49.73	29.98					48.73	17.95	53.03	14.39
K291A	56.12	27.58	80.13	28.9					70.88	0.89	65.01	18.57
L292A	18.73	20.14	50.46	31.04					25.12	0.88	49.7	19.92
Q293A	105.55	2.75	69.65	44.79					62.39	8.63	93.93	30.79
L294A	82.72	3.05	75.89	2.26					103.83	6.09	78.73	22.92
K295A	91.59	34.76	85.28	27.94					65.07	5.66	76.35	12
G296A	7.56	3.79	62.71	36.63					4.37	17.93	47.56	6.34
M297A	121.03	65.55	70.73	14.47					73.71	0.72	121.95	16.03
S298A	78.05	24.74	73.98	34.45					103.67	44.23	95.03	19.19
Y299A	59.7	10.47	72.25	38.77					53.58	5.36	61.64	9.93
S300A	91	45.34	107.81	76.67					110.63	3.5	92.73	25.35
M301A	89.05	24.15	102.89	62.45					115.44	17.36	93.89	28.07
C302A	3.36	2.36	40.87	83.77					-3.71	14.43	4.73	1.61
T303A	70.18	34.14	98.89	31.06					102.02	37.07	81.9	28.08
G304A	18.86	7.99	53.63	94.85					21.74	13.4	25.59	2.43
K305A	113.08	0.04	82.99	5.3					121.37	33.33	79.8	13.72
F306A	4.13	1.75	39.8	82.2					-5.74		7.57	3.05
K307A	86.05	0.64	75.58	24.45					104.04	15.52	71.75	30.61
V308A	31.48	42.16	92.7	86.87					52.83	52.04	77.8	10.57
V309A	46.78	89.04	52.25	7.17					57.29	10.16	74.83	28.74
K310A	7.11	0.55	68.45	40.71					-4.94	10.83	65.57	21.11
E311A	42.81	84.68	86.97	29.99					76.76	3.26	85.48	1.28
I312A	103.6	5.8	65.42	44.55					78.02	38.28	62.8	24.06
A313S	47.82	92.35	78.47	30.89					54.25	15.71	66.03	6.32
E314A	82.42	21.02	53.77	12.82					85.94	40.83	75.49	16.63
T315A	-0.44	1.17	18.3						22.85	20.55	39.89	0.98
Q316A	27.34	54.86	151.58	92.46					39.71	8.5	71.17	17.62
H317A	24.86	48.11	84.58	33.11					100.25	37.79	79.81	18.49
G318A	41.4	29.99	57.61	32.56					48.07	6.98	58.68	5.13
T319A	-2.23	3.51	91.45	131.24					-0.02	5.7	34.83	16.52
I320A	40.46	9.31	45.8	56.25					27.99	0.19	34.83	1.06
V321A	22.21	13.61	110.46	146.62					64.35	10.23	49.46	4.05
I322A	59.96	0.23	109.49	141.71					64.29	16.19	57.87	4.79
R323A	69.16	21.38	86.26	1.4					74.86	24.95	81.86	1.87
V324A	37.47	32.45	70.55	93.96					28.19	6.08	49.09	11.08
Q325A	133.29	54.72	102.95	0.49					91.05	11.39	101.74	13.5
Y326A	6.73	3.47	40.92	72.78					-3.25	6.28	11.89	2.34
E327A	127.26	48.25	78.45	2.47					87.53	18.59	76.24	22.37
G328A	54.81	16.55	64.81	54.71					35.14	3.92	56.29	17.67
D329A	153.3	81.07	121.02	34.8					79.42	23.08	99.31	3.25
G330A	104.38	27.34	77.73	39.07					59.04	3.07	89.88	8.52
S331A	141.06	20.78	114.23	32.27					85.08	33.03	122.12	6.38
P332A	36.26	3.73	29.92	29.87					9.74	0.43	32.58	2.69
C333A	1.55	0.63	9.62	11.29					3.17	2.98	4.72	2.75
K334A	67.58	18.27	68.54	25.48					49.16	4.48	63.12	14.16
I335A	9.1	0.39	34.1	66.21					16.09	13.46	12.31	0.39
P336A	52.19	35.16	88.47	105.77					30.72	8.35	50.12	9.59
F337A	61.64	7.17	63.66	73.92					35.47	8.45	37.64	13.32
E338A	136.09	31.77	107.26	12.4					113.5	35.54	105.45	0.93
I339A	9.56	5.12	46.59	90.22					-5.41	7	11.88	1.96
M340A	74.85	13.32	43.77	10.7					57.21	14.28	68.76	26.29
D341A	86.21	4.84	79.99	45.24					67.25	20.83	80.14	6.87
L342A	119.36	43.57	105.58	34.33					102.55	36.22	120.58	26.31
E343A	95.65	33.33	95.64	35.48					82.07	40.42	96.61	7.23
K344A	115.27	22.83	84.84	20.56					41.83	7.43	86.56	17.05
R345A	104.9	38.01	86.17	32.71					64.14	1.61	77.95	20.5
H346A	98.72	18.25	48.74	18.23					100.6	12.96	89.42	8.69
V347A	130.53	23.71	97.43	5.77					93.52	3.6	106.2	5.35
L348A	107.31	20.65	93.84	34.98					76.55	3.86	92.67	6.2
G349A	46.36	25.71	67.61	18.23					22.31	21.48	45.48	2.26
R350A	34.58	11.5	60.6	48.34					30.42	24.27	57.09	9.03
L351A	85.98	16.32	52.25	4.3					47.11	26.17	72.63	12.68
I352A	14.56	12.3	32.14	22.16					-4.86	17.03	39.08	7.57
T353A	28.78	11.7	24.72	33.45					12.06	1.4	38.21	11.49
V354A	104.23	60.71	143.13	43.6					77.19	42.24	118.93	27.36
N355A	103.61	31.46	82.94	19.37					52.71	22.66	78.19	19.89
P356A	25.4	2.51	68.31	35.73					41.34	21.5	54.48	14.1
I357A	45.4	4.86	66.92	22.51					28.74	4.55	65.99	14.27
V358A	58.09	63.37	126.88	98.52					103.41	34.22	55.26	7.42
T359A	99.26	37.27	71.12	8.4					113.24	7.33	91.27	33.86
E360A	96.85	23.72	107.04	40.94					100.59	75.65	110.76	30.72
K361A	93.93	6.26	81.41	37.56					107.1	38.63	92.3	31.56
D362A	95.97	12.03	77.37	33.77					94.38	0.21	113.34	30.13
S363A	112.19	25.86	142.52	91.02					97.08	15.72	101.29	27.2
P364A	95.21	12.58	116.29	63.14					96.57	5.43	96.1	39.19
V365A	56.34	8.92	51.39	42.35					43.02	2.98	53.38	1.91
N366A	19.38	11.73	65.99	14.05					79.17	14.14	94.7	21.62
I367A	7.43	3.32	0.58	3.06					1.52	5.76	7.97	2.79
E368A	4.93	1.4	47.45	69.89					-6.78	4.97	24.09	3.88
A369S	78.12	15.87	68.43	54.12					40.5	17.47	53.45	9.99
E370A	116.89	16.34	53.31	40.4					101.23	46.17	67.56	26.78
P371A	52.32	27.4	42.53	17.45					71.72	6.41	69.89	0.41
P372A	56.67	39.71	72.64	33.35					53.7	3.67	55.55	10.38
F373A	87.6	28.16	94.31	0.25					83.41	34.79	111.72	38.86
G374A	48.7	16.26	65.65	48.27					42.3	4.76	69.11	23.15
D375A	130.02	28.29	94.01	52.41					124.66	0.66	124.95	45.64
S376A	54.88	13.67	68.56	28.87					48.06	13.35	75.44	8.51
Y377A	112.54	12.47	83.63	2.34					73.55	29.02	104.57	9.76
I378A	30.86	22.36	94.67	163.42					42.04	21.77	32.3	10.04
I379A	66.09	34.48	61.88	24.33					67.73	24.88	81.63	9.66
I380A	2.45	1.16	0.16	4.12					-4.92	8.09	7.42	3.14
G381A	2.12	1.55	31.87	64.79					3.21	5.87	4.18	0.18
V382A	101.81	11.86	156.58	55.15					106.99	32.95	89.66	12.57
E383A	105.88	6.75	61.32	31.87					82.43	27.54	96.49	20.21
P384A	51.95	29.31	45.15	48.01					47.82	0.09	43.02	13.93
G385A	127.56	6.39	78.1	44.7					71.78	27.49	88.48	0.89
Q386A	126.56	5.72	89.43	12.82					100.86	39.08	99.47	35.68
L387A	35.49	1.68	18.47	13.61					20.05	12.22	44.46	6.97
K388A	78.02	38.75	92.21	0.46					104.75	39.62	99.26	40.25
L389A	42.35	10.42	23.45	14.86					30.61	14.49	34.13	6.07
N390A	110.88	74.96	93.94	15.61					114.41	69.09	105.62	26.56
W391A	26.13	15.72	41.97	71.14					21.99	17.6	37.39	13.78
F392A	104.47	9.7	74.8	27.02					71.8	2.08	74.76	28.43
K393A	85.57	10.74	67.17	23.34					28.18	2.94	54.48	6.71
K394A	123.62	4.51	77.75	31.13					74.71	57.66	97.86	33.09
G395A	108.68	56.41	129.12	49.79					87.12	41.99	78.74	7.24
S396A	119.03	35.61	86.01	40.54					113.43	0.81	106.04	8.48
S397A	131.14	36.71	50.84	2.17					76.24	8.58	107.72	40.35
I398A	108.43	14.79	84.91	61.98					106.83	1.4	114.43	27.74
G399A	120	15.59	96.89	53.06					118.24	80.64	91.43	43.27
Q400A	139.28	4.15	104.82	78.92					82.23	18.55	95.18	4.85
M401A	130	7.06	122.1	82.86					88.27	39.71	118.25	25.11
F402A	111.08	39.98	119.2	64.62					154.6	24.91	96.6	8.66
E403A	100.02	28.71	78.69	14.4					94.59	32.11	102.41	30.49
T404A	100.86	23.51	81.22	15.52					139.28	6.12	106.54	34.17
T405A	103.24	60.88	79.46	1.36					116.19	96.19	111.47	23.6
M406A	112.74	27.6	96.35	21.02					98.62	7.68	95.63	44.04
R407A	116.8	6.09	102.79	18.61					57.98	36.53	76.63	0.62
G408A	114.8	22.32	88.1	23.75					86.23	1.98	114.78	21.15
A409S	122.97	11.67	59.42	32.56					123.88	36.55	101.88	20.01
K410A	97.26	12.41	61.69	70.91					109.5	4.22	106.36	14.71
R411A	104.95	19.28	143.22	65.27					62.51	31.59	104.58	38.61
M412A	109.05	28.27	128.81	60.66					98.94	37.82	97.83	41.45
A413S	104.21	14.93	133.05	66.26					83.79	15.34	109.92	5.63
I414A	136.17	32.92	129.58	16.58					105.36	3.41	91.6	33.94
L415A	100.93	13.44	142.7	97.05					105.73	36.98	106.88	37.91
G416A	108.04	33.86	156.31	143.04					120.95	38	87.76	4.1
D417A	89.53	5.11	84.27	10.19					111.72	20.96	116.5	8.68
T418A	102.29	44.56	85.86	5.58					81.81	6.41	102.96	17.79
A419S	113.32	14.81	103.03	13					83.71	2.74	116.24	29.7
W420A	110.89	37.08	85.72	40.69					70.9	3.01	110.18	7.68
D421A	122.53	19.88	90.55	21.25					104.66	4.41	114.16	26.61
F422A	106.66	7.49	86.87	7.8					111	24.08	88.26	17.79
G423A	117.54	54.1	102.39	58.74					80.93	26.42	119.68	27.72
S424A	140.8	95.28	96.69	37.1					73.05	33.56	108.84	4.86
L425A	112.18	60.48	113.13	52.46					76.21	6.29	119.11	22.92
G426A	119.53	68.92	110.78	24.09					73.79	46.41	118.21	18.48
G427A	137.43	68.59	115.27	49.7					64.76	48.55	103.44	5.12
V428A	116.31	53.75	85.61	6.97					112.23	0.34	87.01	1.71
F429A	123.32	24.87	113.53	27.08					97.92	8.07	108.39	27.35
T430A	118.16	61.87	91.37	6.5					78.24	9.98	88.8	10.54
S431A	112.71	9.11	107.45	32.86					120.23	58.89	92.46	26.19
I432A	126.24	7.39	79.06	0.28					119.02	23.47	94.66	12.9
G433A	107.71	8.72	93.27	33.48					112.85	32.2	95.66	16.31
K434A	134.26	41.54	83.61	7.98					114.76	7.53	95.47	27.36
A435S	117.22	47.12	86.17	1.12					77.78	5.69	97.52	3.99
L436A	121.85	54.85	123.29	28.06					134.94	11.59	119.27	15.23
H437A	138.18	43.62	102.29	3.36					62.75	38.53	107.26	15.42
Q438A	133.2	11.4	138.23	102.7					91.87	49.12	106.4	32.73
V439A	96.12	0.13	91.88	4.29					81.61	7.4	105.63	33.94
F440A	116	43.9	106.57	49.72					78.42	7.75	112.35	6.26
G441A	141.04	70.69	84.08	26.61					76.87	8.2	122.74	14.79
A442S	114.27	34.82	108.69	36.92					57.2	21.27	95.53	24.06
I443A	110.13	14.59	99.49	7.04					113.59	24.4	104.63	10.71
Y444A	108.56	3.54	96.58	39.47					81.8	6.69	88.2	7.15
G445A	103.21	10.18	163.05	59.39					52.05	32.27	91.61	6.74
A446S	133.5	8	90.54	8.41					104.32	49.84	94.06	19.6
A447S	128.49	18.66	86.64	11.33					76.19	19.46	104.79	26.83
F448A	113.46	59.98	124.79	61.81					84.52	30.62	108.37	8.83
S449A	139.64	84.31	89.1	23.77					83.9	15.03	110.3	35.08
G450A	81.58	20.93	80.45	14.24					91.96	24.84	94.77	28.97
V451A	124.69	94.97	97.19	17.08					81.66	28.27	110.68	40.14
S452A	90.37	13.79	94.34	3.76					66.51	26.14	99.23	25.28
W453A	140.03	37.55	91.18	25.32					136.48	21.55	113.19	17.45
T454A	92.83	40.98	65.4						98.8	25.61	100.44	1.89
M455A	116.97	18.56	106.75	30.75					109.19	14.94	109.01	33.51
K456A	112.33	33.13	83.41	47.57					95.19	66.39	97.34	19.64
I457A	111.75	16.99	74.98	24.6					127.77	0.57	106.26	15.35
L458A	89.74	29	82.32	23.78					105.96	1.7	114.4	43.9
I459A	109.45	4.52	135.31	71.55					91.3	15.11	110.72	2.78
G460A	104.57	28.27	69.6	2.45					100.18	19.94	97.83	13.36
V461A	103.54	44.16	146.43	91.53					112.12	37.16	115.74	36.81
I462A	150.64	74.11	84.26	18.69					82.55	21.79	99.35	0.51
I463A	128.78	63.83	67.4	16.76					128.73	23.55	108.98	27.78
T464A	100.66	28.24	77.49	13.18					154.23	58.48	98.29	5.59
W465A	91.56	6.07	79.26	3.2					79.58	10.92	118.53	23.69
I466A	100.73	40.16	89.39	28.05					91.4	51.45	90.82	7.05
G467A	117.27	3.41	67.93	31.66					142.04	7.84	81.63	15.89
M468A	83.68	13.59	93.41	59.42					76.29	34.53	99.25	15.7
N469A	103.68	2.35	62.84						91.38	18.61	90.12	18.6
S470A	69.49	58.3	141.35	78.97					80.75	42.25	89.21	27.29
R471A	83.1	17.35	90.4	1.97					91.42	56.68	109.64	0.26
S472A	83.14	7.91	96.97	14.35					99.13	8.84	119.84	22.43
T473A	118	13.22	110.89	26.39					132.15	22.09	115.02	39.31
S474A	94.27	2.32	73.97	18.04					77.03	5.48	112.32	38.01
L475A	143.48	80.68	77.43	20.13					76.45	5.42	103.03	22.51
S476A	112.72	15.44	140.67	78.53					77.77	15.68	106.47	41.26
V477A	112.51	23.36	73.59	18.76					92.96	3.48	115.99	36.78
T478A	147.52	14.16	68.51	29.02					90.17	2.76	115.45	10.72
L479A	154.93	7.22	52.5	5.57					119.93	3.54	112.32	18.58
V480A	125.56	24.25	82.01	26.89					108.41	75.58	92.4	14.14
L481A	138.98	37.5	102.84	72.75					93.72	15.14	87.89	4.34
V482A	133.61	33.32	121.16	85.15					88.15	3.52	99.57	1.85
G483A	87.7	29.46	98.75	4.51					96.34	33.86	95.68	30.49
I484A	86.82	65.65	87.18	17.81					113.59	46.25	110.93	21.08
V485A	133.98	11.61	67.4	33.1					95.28	59.72	113.56	28.25
T486A	111.03	31.53	98.46	26.43					115.25	8.75	103.53	35.6
L487A	140.41	25.88	86.21	11.41					74.65	2.75	102.89	39.69
Y488A	146.33	63.7	80.1	21.7					90.52	66.94	108.55	25.99
L489A	111.32	30.15	119.27	48.85					73.69	22.57	92.36	3.38
G490A	124.93	67.7	100.2	25.79					69.58	8.9	107.2	21.94
V491A	106.43	43.14	62.16	2.06					78.88	17.26	111.62	14.89
M492A	105.77	55.06	74.12	54.2					100.1	38.23	113.21	24.11
V493A	130.04	56.61	107.61	90.83					91.86	2.6	90.86	9.39
Q494A	96.64	54.11	116.22	59.46					87.06	15.21	96.93	10.84
A495S	92.6	38.02	94.64	55.64					145.19	19.08	98.03	22.33
