# Supplementary material for: Broadly neutralizing human antibodies against dengue virus identified by single B cell transcriptomics
Source: eLife journal article supplement (doi:10.7554/elife.52384), 2019-12-10
Supplement: supp [file elife-52384-supp-v1.zip › elife_poa_e52384_Figure_6_source_data_1.csv]

Clone	Isotype	RAW_SEQUENCE	V_CALL	D_CALL	J_CALL	SEQUENCE_VDJ	SEQUENCE_IMGT_ALIGNED	JUNCTION	JUNCTION_LENGTH	V_IDENTITY	CDR3_IMGT
J8_J9_VDJ_germline		CAGGTCCAGCTGGTGCAGTCTGGGGCTGAGGTGAAGAAGCCTGGGTCCTCGGTGAAGGTCTCCTGCAAGGCTTCTGGAGGCACCTTCAGC---AGCTATGCTATCAGCTGGGTGCGACAGGCCCCT---GGACAAGGGCTTGAGTGGATGGGAGGGATCATCCCTATCTTTGGTACAGCAAACTACGCACAGAAGTTCCAGGGCAGAGTCACGATTACCACGGACGAATCCACGAGCACAGCCTACATGGAGCTGAGCAGCCTGAGATCTGAGGACACGGCCGTGTATTACTGTGCGAGATATTGTAGTAGTACCAGCTGCTATGACAACTGGTTCGACCCCTGGGGCCAGGGAACCCTGGTCACCGTCTCCTCAG-----------------------…	IGHV1-69*05	IGHD2-2*01,IGHD2-2*03	IGHJ5*02	CAGGTCCAGCTGGTGCAGTCTGGGGCTGAGGTGAAGAAGCCTGGGTCCTCGGTGAAGGTCTCCTGCAAGGCTTCTGGAGGCACCTTCAGCAGCTATGCTATCAGCTGGGTGCGACAGGCCCCTGGACAAGGGCTTGAGTGGATGGGAGGGATCATCCCTATCTTTGGTACAGCAAACTACGCACAGAAGTTCCAGGGCAGAGTCACGATTACCACGGACGAATCCACGAGCACAGCCTACATGGAGCTGAGCAGCCTGAGATCTGAGGACACGGCCGTGTATTACTGTGCGAGATATTGTAGTAGTACCAGCTGCTATGACAACTGGTTCGACCCCTGGGGCCAGGGAACCCTGGTCACCGTCTCCTCAG	CAGGTCCAGCTGGTGCAGTCTGGGGCT...GAGGTGAAGAAGCCTGGGTCCTCGGTGAAGGTCTCCTGCAAGGCTTCTGGAGGCACCTTC............AGCAGCTATGCTATCAGCTGGGTGCGACAGGCCCCTGGACAAGGGCTTGAGTGGATGGGAGGGATCATCCCTATC......TTTGGTACAGCAAACTACGCACAGAAGTTCCAG...GGCAGAGTCACGATTACCACGGACGAATCCACGAGCACAGCCTACATGGAGCTGAGCAGCCTGAGATCTGAGGACACGGCCGTGTATTACTGTGCGAGATATTGTAGTAGTACCAGCTGCTATGACAACTGGTTCGACCCCTGGGGCCAGGGAACCCTGGTCACCGTCTCCTCAG	TATTACTGTGCGAGATATTGTAGTAGTACCAGCTGCTATGACAACTGGTTCGAC	54	1	GCGAGATATTGTAGTAGTACCAGCTGCTATGACAACTGGTTCGACCCC
A	IgG	------------------------GCTGAGGTGAAGAAGCCTGGGTCCTCAGTGAAGGTCTCCTGCAAGGCTTCTGGAGGCACCTTCAGC---AGCTATGCTATCAGCTGGGTGCGACAGGCCCCT---GGACAAGGGCTTGAGTGGATGGGAGGGATCATCCCTATCTTTGGTACAGCAAACTACGCACAGAAGTTCCAGGGCAGAGTCACGATTACCACGGACGAATCCACGAGCACAGCCTACATGGAGCTGAGCAGCCTGAGATCTGAGGACACGGCCGTGTATTACTGTGCGAGATACTGTTACAGTGCCAGTTGTTATCACAACTGGTTCGACCCCTGGGGCCAGGGAACGCTGGTCACCGTCTCCTCAGCCTCCACCAAGGGCCCATCGGTC…	IGHV1-69*05,IGHV1-69*13	IGHD3-22*01,IGHD3-3*01,IGHD3-3*02	IGHJ5*02	GCTGAGGTGAAGAAGCCTGGGTCCTCAGTGAAGGTCTCCTGCAAGGCTTCTGGAGGCACCTTCAGCAGCTATGCTATCAGCTGGGTGCGACAGGCCCCTGGACAAGGGCTTGAGTGGATGGGAGGGATCATCCCTATCTTTGGTACAGCAAACTACGCACAGAAGTTCCAGGGCAGAGTCACGATTACCACGGACGAATCCACGAGCACAGCCTACATGGAGCTGAGCAGCCTGAGATCTGAGGACACGGCCGTGTATTACTGTGCGAGAGAGGACACGGCCGTGAGTTGTTATGACAACTGGTTCGACCCCTGGGGCCAGGGAACGCTGGTCACCGTCTCCTCAG	........................GCT...GAGGTGAAGAAGCCTGGGTCCTCAGTGAAGGTCTCCTGCAAGGCTTCTGGAGGCACCTTC............AGCAGCTATGCTATCAGCTGGGTGCGACAGGCCCCTGGACAAGGGCTTGAGTGGATGGGAGGGATCATCCCTATC......TTTGGTACAGCAAACTACGCACAGAAGTTCCAG...GGCAGAGTCACGATTACCACGGACGAATCCACGAGCACAGCCTACATGGAGCTGAGCAGCCTGAGATCTGAGGACACGGCCGTGTATTACTGTGCGAGAGAGGACACGGCCGTGAGTTGTTATGACAACTGGTTCGACCCCTGGGGCCAGGGAACGCTGGTCACCGTCTCCTCAG	CTGAGATCTGAGGACACGGCCGTGTATTACTGTGCGAGATACTGTTACAGTGCC	54	0.9963	GCGAGAGAGGACACGGCCGTGAGTTGTTATGACAACTGGTTCGACCCC
B	IgG	------------------------GCTGAGGTGAAGAAGCCTGGGTCCTCGGTGAAGGTCTCCTGCAAGGCTTCTGGAGGCACCTTCAGC---AGCTATGCTATCAGCTGGGTGCGACAGGCCCCT---GGACAAGGGCTTGAGTGGATGGGAGGGATCATCCCTATCTTTGGTACAGCAAACTACGCACAGAAGTTCCAGGGCAGAGTCACGATTACCGCGGACAAATCCACGAGCACAGCCTACATGGAGCTGAGCAGCCTGAGATCTGAGGACACGGCCGTGTATTACTGTGCGAGATACTGTTACAGTGCCAGTTGTTATCACAACTGGTTCGACCCCTGGGGCCAGGGAACGCTGGTCACCGTCTCCTCAGCCTCCACCAAGGGCCCATCGGTC…	IGHV1-69*06,IGHV1-69*14	IGHD3-22*01,IGHD3-3*01,IGHD3-3*02	IGHJ5*02	GCTGAGGTGAAGAAGCCTGGGTCCTCGGTGAAGGTCTCCTGCAAGGCTTCTGGAGGCACCTTCAGCAGCTATGCTATCAGCTGGGTGCGACAGGCCCCTGGACAAGGGCTTGAGTGGATGGGAGGGATCATCCCTATCTTTGGTACAGCAAACTACGCACAGAAGTTCCAGGGCAGAGTCACGATTACCGCGGACAAATCCACGAGCACAGCCTACATGGAGCTGAGCAGCCTGAGATCTGAGGACACGGCCGTGTATTACTGTGCGAGAGAGGACACGGCCGTGAGTTGTTATGACAACTGGTTCGACCCCTGGGGCCAGGGAACGCTGGTCACCGTCTCCTCAG	........................GCT...GAGGTGAAGAAGCCTGGGTCCTCGGTGAAGGTCTCCTGCAAGGCTTCTGGAGGCACCTTC............AGCAGCTATGCTATCAGCTGGGTGCGACAGGCCCCTGGACAAGGGCTTGAGTGGATGGGAGGGATCATCCCTATC......TTTGGTACAGCAAACTACGCACAGAAGTTCCAG...GGCAGAGTCACGATTACCGCGGACAAATCCACGAGCACAGCCTACATGGAGCTGAGCAGCCTGAGATCTGAGGACACGGCCGTGTATTACTGTGCGAGAGAGGACACGGCCGTGAGTTGTTATGACAACTGGTTCGACCCCTGGGGCCAGGGAACGCTGGTCACCGTCTCCTCAG	CTGAGATCTGAGGACACGGCCGTGTATTACTGTGCGAGATACTGTTACAGTGCC	54	1	GCGAGAGAGGACACGGCCGTGAGTTGTTATGACAACTGGTTCGACCCC
C	IgG	------------------------GCTGAGGTGAAGAAGCCTGGGTCCTCAGTGAAGGTCTCCTGCAAGGCTTCTGGAGGCACCTTCAGC---AGCTATGCTATCAGCTGGGTGCGACAGGCCCCT---GGACAAGGGCTTGAGTGGATGGGAGGGATCATCCCTATCTTTGGTACAGCAAACTACGCACAGAAGTTCCAGGGCAGAGTCACGATTACCGCGGACAAATCCACGAGCACAGCCTACATGGAGCTGAGCAGCCTGAGATCTGAGGACACGGCCGTGTATTACTGTGCGAGATATTGTAGTAGTGCCAGTTGCTATCACAACTGGTTCGACCCCTGGGGCCAGGGAACCCTGGTCACCGTCTCCTCAGCCTCCACCAAGGGCCCATCGGTC…	IGHV1-69*06,IGHV1-69*13,IGHV1-69*14	IGHD2-2*01,IGHD2-2*02,IGHD2-2*03	IGHJ5*02	GCTGAGGTGAAGAAGCCTGGGTCCTCAGTGAAGGTCTCCTGCAAGGCTTCTGGAGGCACCTTCAGCAGCTATGCTATCAGCTGGGTGCGACAGGCCCCTGGACAAGGGCTTGAGTGGATGGGAGGGATCATCCCTATCTTTGGTACAGCAAACTACGCACAGAAGTTCCAGGGCAGAGTCACGATTACCGCGGACAAATCCACGAGCACAGCCTACATGGAGCTGAGCAGCCTGAGATCTGAGGACACGGCCGTGTATTACTGTGCGAGATATTGTAGTAGTGCCAGTTGCTATGACAACTGGTTCGACCCCTGGGGCCAGGGAACCCTGGTCACCGTCTCCTCAG	........................GCT...GAGGTGAAGAAGCCTGGGTCCTCAGTGAAGGTCTCCTGCAAGGCTTCTGGAGGCACCTTC............AGCAGCTATGCTATCAGCTGGGTGCGACAGGCCCCTGGACAAGGGCTTGAGTGGATGGGAGGGATCATCCCTATC......TTTGGTACAGCAAACTACGCACAGAAGTTCCAG...GGCAGAGTCACGATTACCGCGGACAAATCCACGAGCACAGCCTACATGGAGCTGAGCAGCCTGAGATCTGAGGACACGGCCGTGTATTACTGTGCGAGATATTGTAGTAGTGCCAGTTGCTATGACAACTGGTTCGACCCCTGGGGCCAGGGAACCCTGGTCACCGTCTCCTCAG	CTGAGATCTGAGGACACGGCCGTGTATTACTGTGCGAGATATTGTAGTAGTGCC	54	0.9963	GCGAGATATTGTAGTAGTGCCAGTTGCTATGACAACTGGTTCGACCCC
D	IgG	------------------------GCTGAGGTGAAGAAGCCTGGGTCCTCAGTGAAGGTCTCCTGCAAGGCTTCTGGAGGCACCTTCAGC---AGCTATGCTATCAGCTGGGTGCGACAGGCCCCT---GGACAAGGGCTTGAGTGGATGGGAGGGATCATCCCTTTCTTTGGTACAAGAGACCACGCACAGAACTTCCAGGGCAGAGTCACGATTACCACGGACGAATCCACGAGCACAGCCTACATGGAGCTGAGCAGCCTGAGATCTGAGGACACGGCCGTCTATTACTGTGCGAGATATTGTAGTAGTCCCAGTTGTTATCACAACTGGTTCGACCCCTGGGGCCAGGGAACCCTGGTCACCGTCTCCTCAGCCTCCACCAAGGGCCCATCGGTC…	IGHV1-69*05,IGHV1-69*13	IGHD2-2*01,IGHD2-2*02,IGHD2-2*03	IGHJ5*02	GCTGAGGTGAAGAAGCCTGGGTCCTCAGTGAAGGTCTCCTGCAAGGCTTCTGGAGGCACCTTCAGCAGCTATGCTATCAGCTGGGTGCGACAGGCCCCTGGACAAGGGCTTGAGTGGATGGGAGGGATCATCCCTTTCTTTGGTACAAGAGACCACGCACAGAACTTCCAGGGCAGAGTCACGATTACCACGGACGAATCCACGAGCACAGCCTACATGGAGCTGAGCAGCCTGAGATCTGAGGACACGGCCGTCTATTACTGTGCGAGATATTGTAGTAGTCCCAGTTGTTATGACAACTGGTTCGACCCCTGGGGCCAGGGAACCCTGGTCACCGTCTCCTCAG	........................GCT...GAGGTGAAGAAGCCTGGGTCCTCAGTGAAGGTCTCCTGCAAGGCTTCTGGAGGCACCTTC............AGCAGCTATGCTATCAGCTGGGTGCGACAGGCCCCTGGACAAGGGCTTGAGTGGATGGGAGGGATCATCCCTTTC......TTTGGTACAAGAGACCACGCACAGAACTTCCAG...GGCAGAGTCACGATTACCACGGACGAATCCACGAGCACAGCCTACATGGAGCTGAGCAGCCTGAGATCTGAGGACACGGCCGTCTATTACTGTGCGAGATATTGTAGTAGTCCCAGTTGTTATGACAACTGGTTCGACCCCTGGGGCCAGGGAACCCTGGTCACCGTCTCCTCAG	CTGAGATCTGAGGACACGGCCGTCTATTACTGTGCGAGATATTGTAGTAGTCCC	54	0.97037	GCGAGATATTGTAGTAGTCCCAGTTGTTATGACAACTGGTTCGACCCC
J9	IgG	------------------------GCTGAGGTGAGGAAGCCTGGGTCCTCAGTGAAGGTCTCCTGCAAGACTTCTGGAGGCTCCCTCAAC---AGTTATGGCATCAGTTGGGTGCGACAGGCCCCTGGAGGACAAGGGCTTGAGTGGATGGGAGGGATCATCCCTTTCTTTGGTACAGTTATCTATTCAGACAATTACCAGGGCAGAGCCTCGTTTTCCTCGGACGAATCTACGACCACAGCCTACATGGAGCTGAGAAGCCTAAGATCTGAGGACACGGCCGTGTATTACTGTGCGAGATATTGTTATAGTGCCAGTTGTTATCACAACTGGTTCGACCCCTGGGGCCAGGGAACCCTGGTCACCGTCTCCACAGCCTCCACCAAG------------…	IGHV1-69*13	IGHD2-2*01,IGHD2-2*02,IGHD2-2*03	IGHJ5*02	GCTGAGGTGAGGAAGCCTGGGTCCTCAGTGAAGGTCTCCTGCAAGACTTCTGGAGGCTCCCTCAACAGTTATGGCATCAGTTGGGTGCGACAGGCCCCTGGAGGACAAGGGCTTGAGTGGATGGGAGGGATCATCCCTTTCTTTGGTACAGTTATCTATTCAGACAATTACCAGGGCAGAGCCTCGTTTTCCTCGGACGAATCTACGACCACAGCCTACATGGAGCTGAGAAGCCTAAGATCTGAGGACACGGCCGTGTATTACTGTGCGAGATATTGTTATAGTGCCAGTTGTTATAACAACTGGTTCGACCCCTGGGGCCAGGGAACCCTGGTCACCGTCTCCACAG	........................GCT...GAGGTGAGGAAGCCTGGGTCCTCAGTGAAGGTCTCCTGCAAGACTTCTGGAGGCTCCCTC............AACAGTTATGGCATCAGTTGGGTGCGACAGGCCCCTGGACAAGGGCTTGAGTGGATGGGAGGGATCATCCCTTTC......TTTGGTACAGTTATCTATTCAGACAATTACCAG...GGCAGAGCCTCGTTTTCCTCGGACGAATCTACGACCACAGCCTACATGGAGCTGAGAAGCCTAAGATCTGAGGACACGGCCGTGTATTACTGTGCGAGATATTGTTATAGTGCCAGTTGTTATAACAACTGGTTCGACCCCTGGGGCCAGGGAACCCTGGTCACCGTCTCCACAG	AGATCTGAGGACACGGCCGTGTATTACTGTGCGAGATATTGTTATAGTGCCAGT	54	0.88645	GCGAGATATTGTTATAGTGCCAGTTGTTATAACAACTGGTTCGACCCC
E	IgG	------------------------GCTGAGGTGAGGAAGCCTGGGTCCTCAGTGAAGGTCTCCTGCAAGATTTCTGGAGGCTCCCTCAAC---AGTTATGGCATCAGCTGGGTGCGACAGGCCCCTGGTGGACAAGGGCTTGAGTGGATGGGAGGGATCATCCCTTTCTTTGGTACAGTTATCTATTCAGACAATTACCAGGACAGAGTCTCGTTTTCCTCGGACGAATCTACGACCACAGCCTACATGGAGCTGAGAAGCCTAAGATCTGAGGACACGGCCGTGTATTACTGTGCGAGATATTGTTATAGTGCCAGTTGTTATCACAACTGGTTCGACCCCTGGGGCCAGGGAACCCTGGTCACCGTCTCCTCAGCCTCCACCAAGGGCCCATCGGTC…	IGHV1-69*13	IGHD2-2*01,IGHD2-2*02,IGHD2-2*03	IGHJ5*02	GCTGAGGTGAGGAAGCCTGGGTCCTCAGTGAAGGTCTCCTGCAAGATTTCTGGAGGCTCCCTCAACAGTTATGGCATCAGCTGGGTGCGACAGGCCCCTGGTGGACAAGGGCTTGAGTGGATGGGAGGGATCATCCCTTTCTTTGGTACAGTTATCTATTCAGACAATTACCAGGACAGAGTCTCGTTTTCCTCGGACGAATCTACGACCACAGCCTACATGGAGCTGAGAAGCCTAAGATCTGAGGACACGGCCGTGTATTACTGTGCGAGATATTGTTATAGTGCCAGTTGTTATAACAACTGGTTCGACCCCTGGGGCCAGGGAACCCTGGTCACCGTCTCCTCAG	........................GCT...GAGGTGAGGAAGCCTGGGTCCTCAGTGAAGGTCTCCTGCAAGATTTCTGGAGGCTCCCTC............AACAGTTATGGCATCAGCTGGGTGCGACAGGCCCCTGGACAAGGGCTTGAGTGGATGGGAGGGATCATCCCTTTC......TTTGGTACAGTTATCTATTCAGACAATTACCAG...GACAGAGTCTCGTTTTCCTCGGACGAATCTACGACCACAGCCTACATGGAGCTGAGAAGCCTAAGATCTGAGGACACGGCCGTGTATTACTGTGCGAGATATTGTTATAGTGCCAGTTGTTATAACAACTGGTTCGACCCCTGGGGCCAGGGAACCCTGGTCACCGTCTCCTCAG	AGATCTGAGGACACGGCCGTGTATTACTGTGCGAGATATTGTTATAGTGCCAGT	54	0.88645	GCGAGATATTGTTATAGTGCCAGTTGTTATAACAACTGGTTCGACCCC
F	IgA	------------------------GCTGAGGTGAGGAAGCCTGGGTCCTCAGTGAAGGTCTCCTGCAAGATTTCTGGAGGCTCCCTCAAC---AGTTATGGCATCAGCTGGGTGCGACAGGCCCCTGGTGGACAAGGGCTTGAGTGGATGGGAGGGATCATCCCTTTCTTTGGTACAGTTATCTATTCAGACAATTACCAGGACAGAGTCTCGTTTTCCTCGGACGAATCTACGACCACAGCCTACATGGAGCTGAGAAGCCTAAGATCTGAGGACACGGCCGTGTATTACTGTGCGAGATATTGTTATAGTGCCAGTTGTTATCACAACTGGTTCGACCCCTGGGGCCAGGGAACCCTGGTCACCGTCTCCACAGCATCCCCGACCAGCCCCAAGGTC…	IGHV1-69*13	IGHD2-2*01,IGHD2-2*02,IGHD2-2*03	IGHJ5*02	GCTGAGGTGAGGAAGCCTGGGTCCTCAGTGAAGGTCTCCTGCAAGATTTCTGGAGGCTCCCTCAACAGTTATGGCATCAGCTGGGTGCGACAGGCCCCTGGTGGACAAGGGCTTGAGTGGATGGGAGGGATCATCCCTTTCTTTGGTACAGTTATCTATTCAGACAATTACCAGGACAGAGTCTCGTTTTCCTCGGACGAATCTACGACCACAGCCTACATGGAGCTGAGAAGCCTAAGATCTGAGGACACGGCCGTGTATTACTGTGCGAGATATTGTTATAGTGCCAGTTGTTATAACAACTGGTTCGACCCCTGGGGCCAGGGAACCCTGGTCACCGTCTCCACAG	........................GCT...GAGGTGAGGAAGCCTGGGTCCTCAGTGAAGGTCTCCTGCAAGATTTCTGGAGGCTCCCTC............AACAGTTATGGCATCAGCTGGGTGCGACAGGCCCCTGGACAAGGGCTTGAGTGGATGGGAGGGATCATCCCTTTC......TTTGGTACAGTTATCTATTCAGACAATTACCAG...GACAGAGTCTCGTTTTCCTCGGACGAATCTACGACCACAGCCTACATGGAGCTGAGAAGCCTAAGATCTGAGGACACGGCCGTGTATTACTGTGCGAGATATTGTTATAGTGCCAGTTGTTATAACAACTGGTTCGACCCCTGGGGCCAGGGAACCCTGGTCACCGTCTCCACAG	AGATCTGAGGACACGGCCGTGTATTACTGTGCGAGATATTGTTATAGTGCCAGT	54	0.88645	GCGAGATATTGTTATAGTGCCAGTTGTTATAACAACTGGTTCGACCCC
G	IgA	------------------------GCTGAGGTGAGGAAGCCTGGGTCCTCAGTGAAGGTCTCCTGCAAGATTTCTGGAGGCTCCCTCAAC---AGTTATGGCATCAGCTGGGTGCGACAGGCCCCTGGTGGACAAGGGCTTGAGTGGATGGGAGGGATCATCCCTTTCTTTGGTACAGTTATCTATTCAGACAATTACCAGGACAGAGTCTCGTTTTCCTCGGACGAATCTACGACCACAGCCTACATGGAGCTGAGAAGCCTAAGATCTGAGGACACGGCCGTGTATTACTGTGCGAGGTATTGTTATAGTGCCAGTTGTTATCACAACTGGTTCGACCCCTGGGGCCAGGGAACCCTGGTCACCGTCTCCACAGCATCCCCGACCAGCCCCAAGGTC…	IGHV1-69*13	IGHD2-2*01,IGHD2-2*02,IGHD2-2*03	IGHJ5*02	GCTGAGGTGAGGAAGCCTGGGTCCTCAGTGAAGGTCTCCTGCAAGATTTCTGGAGGCTCCCTCAACAGTTATGGCATCAGCTGGGTGCGACAGGCCCCTGGTGGACAAGGGCTTGAGTGGATGGGAGGGATCATCCCTTTCTTTGGTACAGTTATCTATTCAGACAATTACCAGGACAGAGTCTCGTTTTCCTCGGACGAATCTACGACCACAGCCTACATGGAGCTGAGAAGCCTAAGATCTGAGGACACGGCCGTGTATTACTGTGCGAGGTATTGTTATAGTGCCAGTTGTTATAACAACTGGTTCGACCCCTGGGGCCAGGGAACCCTGGTCACCGTCTCCACAG	........................GCT...GAGGTGAGGAAGCCTGGGTCCTCAGTGAAGGTCTCCTGCAAGATTTCTGGAGGCTCCCTC............AACAGTTATGGCATCAGCTGGGTGCGACAGGCCCCTGGACAAGGGCTTGAGTGGATGGGAGGGATCATCCCTTTC......TTTGGTACAGTTATCTATTCAGACAATTACCAG...GACAGAGTCTCGTTTTCCTCGGACGAATCTACGACCACAGCCTACATGGAGCTGAGAAGCCTAAGATCTGAGGACACGGCCGTGTATTACTGTGCGAGGTATTGTTATAGTGCCAGTTGTTATAACAACTGGTTCGACCCCTGGGGCCAGGGAACCCTGGTCACCGTCTCCACAG	AGATCTGAGGACACGGCCGTGTATTACTGTGCGAGGTATTGTTATAGTGCCAGT	54	0.88603	GCGAGGTATTGTTATAGTGCCAGTTGTTATAACAACTGGTTCGACCCC
H	IgG	------------------------GCTGAGGTGAAGAAGCCTGGGTCCTCAGTGAAGGTCTCCTGCAAGCCTTCTGGAGGCACCTTCAGCGGTAGTTATGGTCTCGCGTGGGTGCGGCAGGCCCCT---GGACAAGGGCTTGAGTGGATGGGAGGGATCATCCCGTTCTTTGGTACAAGAAACTACGCAGACGACTTCCAGGACAGAATCACGCTTACGACGGACGAAACCACGACCACAGCCTACATGGAGCTGAGCAGCCTGAGATCTGAGGACACGGCCGTGTATTACTGTGCGAGATATTGTAGTAGTGCCAGTTGCTATCACAACTGGTTCGACCCCTGGGGCCAGGGAACCCTGGTCACCGTCTCCTCAGCCTCCACCAAGGGCCCATCGGTC…	IGHV1-69*05,IGHV1-69*13	IGHD2-2*01,IGHD2-2*02,IGHD2-2*03	IGHJ5*02	GCTGAGGTGAAGAAGCCTGGGTCCTCAGTGAAGGTCTCCTGCAAGCCTTCTGGAGGCACCTTCAGCGGTAGTTATGGTCTCGCGTGGGTGCGGCAGGCCCCTGGACAAGGGCTTGAGTGGATGGGAGGGATCATCCCGTTCTTTGGTACAAGAAACTACGCAGACGACTTCCAGGACAGAATCACGCTTACGACGGACGAAACCACGACCACAGCCTACATGGAGCTGAGCAGCCTGAGATCTGAGGACACGGCCGTGTATTACTGTGCGAGATATTGTAGTAGTGCCAGTTGCTATAACAACTGGTTCGACCCCTGGGGCCAGGGAACCCTGGTCACCGTCTCCTCAG	........................GCT...GAGGTGAAGAAGCCTGGGTCCTCAGTGAAGGTCTCCTGCAAGCCTTCTGGAGGCACCTTC............AGCAGTTATGGTCTCGCGTGGGTGCGGCAGGCCCCTGGACAAGGGCTTGAGTGGATGGGAGGGATCATCCCGTTC......TTTGGTACAAGAAACTACGCAGACGACTTCCAG...GACAGAATCACGCTTACGACGGACGAAACCACGACCACAGCCTACATGGAGCTGAGCAGCCTGAGATCTGAGGACACGGCCGTGTATTACTGTGCGAGATATTGTAGTAGTGCCAGTTGCTATAACAACTGGTTCGACCCCTGGGGCCAGGGAACCCTGGTCACCGTCTCCTCAG	AGATCTGAGGACACGGCCGTGTATTACTGTGCGAGATATTGTAGTAGTGCCAGT	54	0.90476	GCGAGATATTGTAGTAGTGCCAGTTGCTATAACAACTGGTTCGACCCC
I	IgG	------------------------GCTGAGGTGAAGAAGCCTGGGTCCTCAGTTAAGGTCTCCTGCAAGCCTTCTGGAGGCACCTTCAGCGGTAGTTATGGTCTCGCGTGGGTGCGGCAGGCCCCT---GGACAAGGGCTTGAGTGGATGGGAGGGATCATCCCTTTCTTTGGGACAAGAAACTACGCAGACGACTTCCAGGACAGAGTCACACTAACCACGGACGAAACCACGACCACAGCCTACATGGAGCTGAGCAGCCTGAGATCTGAGGACACGGCCGTCTATTACTGTGCGAGATATTGTAGTAGTGCCAGTTGCTATCACAACTGGTTCGACCCCTGGGGCCAGGGAACCCTGGTCACCGTCTCCTCAGCCTCCACCAAGGGCCCATCGGTC…	IGHV1-69*05,IGHV1-69*13	IGHD2-2*01,IGHD2-2*02,IGHD2-2*03	IGHJ5*02	GCTGAGGTGAAGAAGCCTGGGTCCTCAGTTAAGGTCTCCTGCAAGCCTTCTGGAGGCACCTTCAGCGGTAGTTATGGTCTCGCGTGGGTGCGGCAGGCCCCTGGACAAGGGCTTGAGTGGATGGGAGGGATCATCCCTTTCTTTGGGACAAGAAACTACGCAGACGACTTCCAGGACAGAGTCACACTAACCACGGACGAAACCACGACCACAGCCTACATGGAGCTGAGCAGCCTGAGATCTGAGGACACGGCCGTCTATTACTGTGCGAGATATTGTAGTAGTGCCAGTTGCTATAACAACTGGTTCGACCCCTGGGGCCAGGGAACCCTGGTCACCGTCTCCTCAG	........................GCT...GAGGTGAAGAAGCCTGGGTCCTCAGTTAAGGTCTCCTGCAAGCCTTCTGGAGGCACCTTC............AGCAGTTATGGTCTCGCGTGGGTGCGGCAGGCCCCTGGACAAGGGCTTGAGTGGATGGGAGGGATCATCCCTTTC......TTTGGGACAAGAAACTACGCAGACGACTTCCAG...GACAGAGTCACACTAACCACGGACGAAACCACGACCACAGCCTACATGGAGCTGAGCAGCCTGAGATCTGAGGACACGGCCGTCTATTACTGTGCGAGATATTGTAGTAGTGCCAGTTGCTATAACAACTGGTTCGACCCCTGGGGCCAGGGAACCCTGGTCACCGTCTCCTCAG	AGATCTGAGGACACGGCCGTCTATTACTGTGCGAGATATTGTAGTAGTGCCAGT	54	0.89744	GCGAGATATTGTAGTAGTGCCAGTTGCTATAACAACTGGTTCGACCCC
J8	IgG	------------------------GCTGAGGTGAAGAAGCCTGGGTCCTCAGTGAAGGTCTCCTGCAAGGCTTCTGGAGGCACCTTCAGC---AGCAATTCTGTCACCTGGGTGCGGCAGGCCCCT---GGACACGGGCTTGAGTGGATGGGAACAATCATCCCTTTCTTTGGTACAAGACACTACGCAGACAACTTTCAGGGCAGAGTCACAGTCACCACGGACGAATCCACGACCACGGTGTACATGGAGCTGAGCAGCCTGAGATCTGACGACACGGCCGTGTATTACTGTGCGCGATCTTGTGAGAGTCCCAGTTGTTACCACAACTGGTTCGACCCCTGGGGCCAGGGAACCCTGGTCACCGTCACCTCAGCCTCCACCAAG------------…	IGHV1-69*05,IGHV1-69*13,IGHV1-69*15	IGHD2-21*01,IGHD2-21*02,IGHD5-18*01	IGHJ5*02	GCTGAGGTGAAGAAGCCTGGGTCCTCAGTGAAGGTCTCCTGCAAGGCTTCTGGAGGCACCTTCAGCAGCAATTCTGTCACCTGGGTGCGGCAGGCCCCTGGACACGGGCTTGAGTGGATGGGAACAATCATCCCTTTCTTTGGTACAAGACACTACGCAGACAACTTTCAGGGCAGAGTCACAGTCACCACGGACGAATCCACGACCACGGTGTACATGGAGCTGAGCAGCCTGAGATCTGACGACACGGCCGTGTATTACTGTGCGCGAGATTGTGCGGCCGTGTATTACTGTGACAACTGGTTCGACCCCTGGGGCCAGGGAACCCTGGTCACCGTCACCTCAG	........................GCT...GAGGTGAAGAAGCCTGGGTCCTCAGTGAAGGTCTCCTGCAAGGCTTCTGGAGGCACCTTC............AGCAGCAATTCTGTCACCTGGGTGCGGCAGGCCCCTGGACACGGGCTTGAGTGGATGGGAACAATCATCCCTTTC......TTTGGTACAAGACACTACGCAGACAACTTTCAG...GGCAGAGTCACAGTCACCACGGACGAATCCACGACCACGGTGTACATGGAGCTGAGCAGCCTGAGATCTGACGACACGGCCGTGTATTACTGTGCGCGAGATTGTGCGGCCGTGTATTACTGTGACAACTGGTTCGACCCCTGGGGCCAGGGAACCCTGGTCACCGTCACCTCAG	CTGAGATCTGACGACACGGCCGTGTATTACTGTGCGCGATCTTGTGAGAGTCCC	54	0.9	GCGCGAGATTGTGCGGCCGTGTATTACTGTGACAACTGGTTCGACCCC
J	IgG	------------------------GCTGAGGTGAAGAAGCCTGGGTCCTCAGTTAAGGTCTCCTGCAAGGCTTCTGGAGGCACCTTCAGC---AGCAATTCTGTCACCTGGGTGCGGCAGGCCCCT---GGACACGGGCTTGAGTGGATGGGAACAATCGTCCCTTTCTTTGGTACAAGACACTCCGCAGACAACTTTCAGGGCAGAGTCACGATCACCACGGACGAATCCACGACCACAGTGTACATGGAGCTGAGCAGCCTGAGATCTGACGACACGGCCGTGTATTACTGTGCGAGATCTTGTGAGAGTCCCAGTTGTTACCACAACTGGTTCGACCCCTGGGGCCAGGGAACCCTGGTCACCGTCACCTCAGCCTCCACCAAGGGCCCATCGGTC…	IGHV1-69*05,IGHV1-69*13,IGHV1-69*15	IGHD2-21*01,IGHD2-21*02,IGHD5-18*01	IGHJ5*02	GCTGAGGTGAAGAAGCCTGGGTCCTCAGTTAAGGTCTCCTGCAAGGCTTCTGGAGGCACCTTCAGCAGCAATTCTGTCACCTGGGTGCGGCAGGCCCCTGGACACGGGCTTGAGTGGATGGGAACAATCGTCCCTTTCTTTGGTACAAGACACTCCGCAGACAACTTTCAGGGCAGAGTCACGATCACCACGGACGAATCCACGACCACAGTGTACATGGAGCTGAGCAGCCTGAGATCTGACGACACGGCCGTGTATTACTGTGCGAGAGATTGTGCGGCCGTGTATTACTGTGACAACTGGTTCGACCCCTGGGGCCAGGGAACCCTGGTCACCGTCACCTCAG	........................GCT...GAGGTGAAGAAGCCTGGGTCCTCAGTTAAGGTCTCCTGCAAGGCTTCTGGAGGCACCTTC............AGCAGCAATTCTGTCACCTGGGTGCGGCAGGCCCCTGGACACGGGCTTGAGTGGATGGGAACAATCGTCCCTTTC......TTTGGTACAAGACACTCCGCAGACAACTTTCAG...GGCAGAGTCACGATCACCACGGACGAATCCACGACCACAGTGTACATGGAGCTGAGCAGCCTGAGATCTGACGACACGGCCGTGTATTACTGTGCGAGAGATTGTGCGGCCGTGTATTACTGTGACAACTGGTTCGACCCCTGGGGCCAGGGAACCCTGGTCACCGTCACCTCAG	CTGAGATCTGACGACACGGCCGTGTATTACTGTGCGAGATCTTGTGAGAGTCCC	54	0.9037	GCGAGAGATTGTGCGGCCGTGTATTACTGTGACAACTGGTTCGACCCC
K	IgG	------------------------GCTGAGGTGAAGAAGCCTGGGTCCTCAGTGAAGGTCTCCTGCAAGGCTTCTGGAGGCACCTTCAGC---AGCAATTCTGTCACCTGGGTGCGGCAGGCCCCT---GGACACGGGCTTGAGTGGATGGGAACAATCATCCCTTTCTTTGGTACAAGACACTACGCAGACAACTTTCAGGGCAGAGTCACGATCACCACGGACGAATCCACGACCACGGTGTACATGGAGCTGAGCAGCCTGAGATCTGACGACACGGCCGTGTATTACTGTGCGCGATCTTGTGAGAGTCCCAGTTGTTACCACAACTGGTTCGACCCCTGGGGCCAGGGAACCCTGGTCACCGTCACCTCAGCCTCCACCAAGGGCCCATCGGTC…	IGHV1-69*05,IGHV1-69*13,IGHV1-69*15	IGHD2-21*01,IGHD2-21*02,IGHD5-18*01	IGHJ5*02	GCTGAGGTGAAGAAGCCTGGGTCCTCAGTGAAGGTCTCCTGCAAGGCTTCTGGAGGCACCTTCAGCAGCAATTCTGTCACCTGGGTGCGGCAGGCCCCTGGACACGGGCTTGAGTGGATGGGAACAATCATCCCTTTCTTTGGTACAAGACACTACGCAGACAACTTTCAGGGCAGAGTCACGATCACCACGGACGAATCCACGACCACGGTGTACATGGAGCTGAGCAGCCTGAGATCTGACGACACGGCCGTGTATTACTGTGCGCGAGATTGTGCGGCCGTGTATTACTGTGACAACTGGTTCGACCCCTGGGGCCAGGGAACCCTGGTCACCGTCACCTCAG	........................GCT...GAGGTGAAGAAGCCTGGGTCCTCAGTGAAGGTCTCCTGCAAGGCTTCTGGAGGCACCTTC............AGCAGCAATTCTGTCACCTGGGTGCGGCAGGCCCCTGGACACGGGCTTGAGTGGATGGGAACAATCATCCCTTTC......TTTGGTACAAGACACTACGCAGACAACTTTCAG...GGCAGAGTCACGATCACCACGGACGAATCCACGACCACGGTGTACATGGAGCTGAGCAGCCTGAGATCTGACGACACGGCCGTGTATTACTGTGCGCGAGATTGTGCGGCCGTGTATTACTGTGACAACTGGTTCGACCCCTGGGGCCAGGGAACCCTGGTCACCGTCACCTCAG	CTGAGATCTGACGACACGGCCGTGTATTACTGTGCGCGATCTTGTGAGAGTCCC	54	0.90741	GCGCGAGATTGTGCGGCCGTGTATTACTGTGACAACTGGTTCGACCCC
L	IgG	------------------------GCTGAGGTGAAGAAGCCTGGGTCCTCAGTGAAGGTCTCCTGCAAGGCTTCTGGAGGCACCTTCAGC---AGCAATTCTGTCACCTGGGTGCGGCAGGCCCCT---GGACACGGGCTTGAGTGGATGGGAACAATCATCCCTTTCTTTGGTACAAGACACTACGCAGACAACTTTCAGGACAGAGTCACGATCACCACGGACGAATCCACGACCACAGTGTATATGGAACTGAGCAGCCTGAGATCTGACGACACGGCCCTGTATTACTGTGCGAGATCTTGTGAGAGTCCCAGTTGTTACCACAACTGGTTCGACCCCTGGGGCCAGGGAACCCTGGTCACCGTCACCTCAGCCTCCACCAAGGGCCCATCGGTC…	IGHV1-69*05,IGHV1-69*13,IGHV1-69*15	IGHD2-21*01,IGHD2-21*02,IGHD5-18*01	IGHJ5*02	GCTGAGGTGAAGAAGCCTGGGTCCTCAGTGAAGGTCTCCTGCAAGGCTTCTGGAGGCACCTTCAGCAGCAATTCTGTCACCTGGGTGCGGCAGGCCCCTGGACACGGGCTTGAGTGGATGGGAACAATCATCCCTTTCTTTGGTACAAGACACTACGCAGACAACTTTCAGGACAGAGTCACGATCACCACGGACGAATCCACGACCACAGTGTATATGGAACTGAGCAGCCTGAGATCTGACGACACGGCCCTGTATTACTGTGCGAGAGATTGTGCGGCCCTGTATTACTGTGACAACTGGTTCGACCCCTGGGGCCAGGGAACCCTGGTCACCGTCACCTCAG	........................GCT...GAGGTGAAGAAGCCTGGGTCCTCAGTGAAGGTCTCCTGCAAGGCTTCTGGAGGCACCTTC............AGCAGCAATTCTGTCACCTGGGTGCGGCAGGCCCCTGGACACGGGCTTGAGTGGATGGGAACAATCATCCCTTTC......TTTGGTACAAGACACTACGCAGACAACTTTCAG...GACAGAGTCACGATCACCACGGACGAATCCACGACCACAGTGTATATGGAACTGAGCAGCCTGAGATCTGACGACACGGCCCTGTATTACTGTGCGAGAGATTGTGCGGCCCTGTATTACTGTGACAACTGGTTCGACCCCTGGGGCCAGGGAACCCTGGTCACCGTCACCTCAG	CTGAGATCTGACGACACGGCCCTGTATTACTGTGCGAGATCTTGTGAGAGTCCC	54	0.9	GCGAGAGATTGTGCGGCCCTGTATTACTGTGACAACTGGTTCGACCCC
M	IgG	------------------------GCTGAGGTGAAGAAGCCTGGGTCCTCAGTGAAGGTCTCCTGCAGGGCTTCTGGAGGCCCCTTCAAT---AGCTATGGTATCACCTGGGTGCGACAGGCCCCT---GGACAAGGGCTTGAGTGGATGGGAGGGATCAGCCCTTTCTTTGGGACACGAAACTACGCAGAGAGGTTCCAAGACAGACTCACGATTACCACGGACGAATCCACGACCGCAGCCTACATGGAGCTGCGCAGCCTGACATCTGACGACACGGCCGTCTATTACTGTGCGAGATATTGTTACAGTGCCAGTTGTTATCACAACTGGTTCGACCCCTGGGGCCAGGGAACCCTGGTCACCGTCTCCTCAGCCTCCACCAAGGGCCCATCGGTC…	IGHV1-69*05,IGHV1-69*13	IGHD3-22*01,IGHD3-3*01,IGHD3-3*02	IGHJ5*02	GCTGAGGTGAAGAAGCCTGGGTCCTCAGTGAAGGTCTCCTGCAGGGCTTCTGGAGGCCCCTTCAATAGCTATGGTATCACCTGGGTGCGACAGGCCCCTGGACAAGGGCTTGAGTGGATGGGAGGGATCAGCCCTTTCTTTGGGACACGAAACTACGCAGAGAGGTTCCAAGACAGACTCACGATTACCACGGACGAATCCACGACCGCAGCCTACATGGAGCTGCGCAGCCTGACATCTGACGACACGGCCGTCTATTACTGTGCGAGAGACGACACGGCCGTCAGTTGTTATGACAACTGGTTCGACCCCTGGGGCCAGGGAACCCTGGTCACCGTCTCCTCAG	........................GCT...GAGGTGAAGAAGCCTGGGTCCTCAGTGAAGGTCTCCTGCAGGGCTTCTGGAGGCCCCTTC............AATAGCTATGGTATCACCTGGGTGCGACAGGCCCCTGGACAAGGGCTTGAGTGGATGGGAGGGATCAGCCCTTTC......TTTGGGACACGAAACTACGCAGAGAGGTTCCAA...GACAGACTCACGATTACCACGGACGAATCCACGACCGCAGCCTACATGGAGCTGCGCAGCCTGACATCTGACGACACGGCCGTCTATTACTGTGCGAGAGACGACACGGCCGTCAGTTGTTATGACAACTGGTTCGACCCCTGGGGCCAGGGAACCCTGGTCACCGTCTCCTCAG	CTGACATCTGACGACACGGCCGTCTATTACTGTGCGAGATATTGTTACAGTGCC	54	0.91481	GCGAGAGACGACACGGCCGTCAGTTGTTATGACAACTGGTTCGACCCC
N	IgG	------------------------GCTGAGGTGAAGAAGCCTGGGTCCTCAGTGAAGGTCTCCTGCAGGGCTTCTGGAGGCCCCTTCAAT---AGCTATGGTATCACCTGGGTGCGACAGGCCCCT---GGACAAGGGCTTGAGTGGATGGGAGGGATCAGCCCTTTCTTTGGTACACGAAACTACGCAGAGAGGTTCCAAGACAGACTCACGATTAGCACGGACGAATCCACGACCGCAGCCTACATGGAGCTGCGCAGCCTGACATCTGACGACACGGCCGTCTATTACTGTGCGAGATATTGTTACAGTGCCAGTTGTTATCACAACTGGTTCGACCCCTGGGGCCAGGGAACCCTGGTCACCGTCTCCTCAGCCTCCACCAAGGGCCCATCGGTC…	IGHV1-69*05,IGHV1-69*13	IGHD3-22*01,IGHD3-3*01,IGHD3-3*02	IGHJ5*02	GCTGAGGTGAAGAAGCCTGGGTCCTCAGTGAAGGTCTCCTGCAGGGCTTCTGGAGGCCCCTTCAATAGCTATGGTATCACCTGGGTGCGACAGGCCCCTGGACAAGGGCTTGAGTGGATGGGAGGGATCAGCCCTTTCTTTGGTACACGAAACTACGCAGAGAGGTTCCAAGACAGACTCACGATTAGCACGGACGAATCCACGACCGCAGCCTACATGGAGCTGCGCAGCCTGACATCTGACGACACGGCCGTCTATTACTGTGCGAGAGACGACACGGCCGTCAGTTGTTATGACAACTGGTTCGACCCCTGGGGCCAGGGAACCCTGGTCACCGTCTCCTCAG	........................GCT...GAGGTGAAGAAGCCTGGGTCCTCAGTGAAGGTCTCCTGCAGGGCTTCTGGAGGCCCCTTC............AATAGCTATGGTATCACCTGGGTGCGACAGGCCCCTGGACAAGGGCTTGAGTGGATGGGAGGGATCAGCCCTTTC......TTTGGTACACGAAACTACGCAGAGAGGTTCCAA...GACAGACTCACGATTAGCACGGACGAATCCACGACCGCAGCCTACATGGAGCTGCGCAGCCTGACATCTGACGACACGGCCGTCTATTACTGTGCGAGAGACGACACGGCCGTCAGTTGTTATGACAACTGGTTCGACCCCTGGGGCCAGGGAACCCTGGTCACCGTCTCCTCAG	CTGACATCTGACGACACGGCCGTCTATTACTGTGCGAGATATTGTTACAGTGCC	54	0.91481	GCGAGAGACGACACGGCCGTCAGTTGTTATGACAACTGGTTCGACCCC
O	IgA	------------------------GCTGAGGTGAAGAAGCCTGGGTCCTCAGTGAAGGTCTCCTGCAGGGCTTCTGGAGGCCCCTTCAAT---AGTTATGGTATCACCTGGGTGCGACAGGCCCCT---GGACAAGGGCTTGAGTGGATGGGAGGGATCAGCCCTTCCTTTGGGACACGAAACTACGCAGAGAGGTTCCAAGACAGACTCACGATTACCACGGACGAGTCTACGACCGCAGCCTACATGGAGCTGCGCAGCCTGACATCTGACGACACGGCCGTCTATTACTGTGCGAGATACTGTTACAGTGCCAGTTGTTATCACAACTGGTTCGACCCCTGGGGCCAGGGAACGCTGGTCACCGTCTCCTCAGCATCCCCGACCAGCCCCAAGGTC…	IGHV1-69*05,IGHV1-69*13	IGHD3-22*01,IGHD3-3*01,IGHD3-3*02	IGHJ5*02	GCTGAGGTGAAGAAGCCTGGGTCCTCAGTGAAGGTCTCCTGCAGGGCTTCTGGAGGCCCCTTCAATAGTTATGGTATCACCTGGGTGCGACAGGCCCCTGGACAAGGGCTTGAGTGGATGGGAGGGATCAGCCCTTCCTTTGGGACACGAAACTACGCAGAGAGGTTCCAAGACAGACTCACGATTACCACGGACGAGTCTACGACCGCAGCCTACATGGAGCTGCGCAGCCTGACATCTGACGACACGGCCGTCTATTACTGTGCGAGAGACGACACGGCCGTCAGTTGTTATGACAACTGGTTCGACCCCTGGGGCCAGGGAACGCTGGTCACCGTCTCCTCAG	........................GCT...GAGGTGAAGAAGCCTGGGTCCTCAGTGAAGGTCTCCTGCAGGGCTTCTGGAGGCCCCTTC............AATAGTTATGGTATCACCTGGGTGCGACAGGCCCCTGGACAAGGGCTTGAGTGGATGGGAGGGATCAGCCCTTCC......TTTGGGACACGAAACTACGCAGAGAGGTTCCAA...GACAGACTCACGATTACCACGGACGAGTCTACGACCGCAGCCTACATGGAGCTGCGCAGCCTGACATCTGACGACACGGCCGTCTATTACTGTGCGAGAGACGACACGGCCGTCAGTTGTTATGACAACTGGTTCGACCCCTGGGGCCAGGGAACGCTGGTCACCGTCTCCTCAG	CTGACATCTGACGACACGGCCGTCTATTACTGTGCGAGATACTGTTACAGTGCC	54	0.9	GCGAGAGACGACACGGCCGTCAGTTGTTATGACAACTGGTTCGACCCC
P	IgA	------------------------GCTGAGGTGAAGAAGCCTGGGTCCTCAGTGAAGGTCTCCTGCAAGGCTTCTGGAGGCACCTTCAGC---AACTATGCTATCAGCTGGGTGCGACAGGCCCCT---GGACAAGGGCTTGAGTGGATGGGAGGGGTCACCCCTTTCTTTGGTACGAGAAACTACGCAGACATGTTCCAGGGCAGAGTCACGATTACCACGGACGAATCCACGAGCACAGTCTACATGGAGCTGAGCAGCCTGAGATCTGAGGACACGGCCGTCTATTATTGTGCGAGATATTGTAGTAGTCCCAGCTGCTATCACAAGTGGTTCGACCCCTGGGGCCAGGGAACCCTGGTCACCGTCTCCTCAGCCTCCACCAAGGGCCCATCGGTC…	IGHV1-69*05,IGHV1-69*13	IGHD2-2*01,IGHD2-2*02,IGHD2-2*03	IGHJ5*02	GCTGAGGTGAAGAAGCCTGGGTCCTCAGTGAAGGTCTCCTGCAAGGCTTCTGGAGGCACCTTCAGCAACTATGCTATCAGCTGGGTGCGACAGGCCCCTGGACAAGGGCTTGAGTGGATGGGAGGGGTCACCCCTTTCTTTGGTACGAGAAACTACGCAGACATGTTCCAGGGCAGAGTCACGATTACCACGGACGAATCCACGAGCACAGTCTACATGGAGCTGAGCAGCCTGAGATCTGAGGACACGGCCGTCTATTATTGTGCGAGATATTGTAGTAGTCCCAGCTGCTATGACAAGTGGTTCGACCCCTGGGGCCAGGGAACCCTGGTCACCGTCTCCTCAG	........................GCT...GAGGTGAAGAAGCCTGGGTCCTCAGTGAAGGTCTCCTGCAAGGCTTCTGGAGGCACCTTC............AGCAACTATGCTATCAGCTGGGTGCGACAGGCCCCTGGACAAGGGCTTGAGTGGATGGGAGGGGTCACCCCTTTC......TTTGGTACGAGAAACTACGCAGACATGTTCCAG...GGCAGAGTCACGATTACCACGGACGAATCCACGAGCACAGTCTACATGGAGCTGAGCAGCCTGAGATCTGAGGACACGGCCGTCTATTATTGTGCGAGATATTGTAGTAGTCCCAGCTGCTATGACAAGTGGTTCGACCCCTGGGGCCAGGGAACCCTGGTCACCGTCTCCTCAG	CTGAGATCTGAGGACACGGCCGTCTATTATTGTGCGAGATATTGTAGTAGTCCC	54	0.94815	GCGAGATATTGTAGTAGTCCCAGCTGCTATGACAAGTGGTTCGACCCC
Q	IgG	------------------------GCTGAGGTGAAGAAGCCTGGGTCCTCAGTGAAGGTCTCCTGCAAGGCTTCTGGAGGCACCTTCAAC---AACTATGCCATCAGCTGGGTGCGACAGGCCCCT---GGACAAGGGCTTGAGTGGATGGGAGGGGTCACCCCTTTCTTTGGTACGAGAAACTACGCCGACATGTTCCAGGACAGAATCACGATTACCACGGACGAATCCACGACCACAGTCTACATGGAACTGAGCAGCCTGAGATCTGAAGACACGGCCGTCTATTATTGTGCGAGATACTGTAGTAATCCCAGCTGCTATCACAAGTGGTTCGACCCCTGGGGCCAGGGAACCCTGGTCACCGTCTCCTCAGCCTCCACCAAGGGCCCATCGGTC…	IGHV1-69*05,IGHV1-69*13	IGHD2-2*01,IGHD2-2*02,IGHD2-2*03	IGHJ5*02	GCTGAGGTGAAGAAGCCTGGGTCCTCAGTGAAGGTCTCCTGCAAGGCTTCTGGAGGCACCTTCAACAACTATGCCATCAGCTGGGTGCGACAGGCCCCTGGACAAGGGCTTGAGTGGATGGGAGGGGTCACCCCTTTCTTTGGTACGAGAAACTACGCCGACATGTTCCAGGACAGAATCACGATTACCACGGACGAATCCACGACCACAGTCTACATGGAACTGAGCAGCCTGAGATCTGAAGACACGGCCGTCTATTATTGTGCGAGAGAATGTAGTAATCCCAGCTGCTATGACAAGTGGTTCGACCCCTGGGGCCAGGGAACCCTGGTCACCGTCTCCTCAG	........................GCT...GAGGTGAAGAAGCCTGGGTCCTCAGTGAAGGTCTCCTGCAAGGCTTCTGGAGGCACCTTC............AACAACTATGCCATCAGCTGGGTGCGACAGGCCCCTGGACAAGGGCTTGAGTGGATGGGAGGGGTCACCCCTTTC......TTTGGTACGAGAAACTACGCCGACATGTTCCAG...GACAGAATCACGATTACCACGGACGAATCCACGACCACAGTCTACATGGAACTGAGCAGCCTGAGATCTGAAGACACGGCCGTCTATTATTGTGCGAGAGAATGTAGTAATCCCAGCTGCTATGACAAGTGGTTCGACCCCTGGGGCCAGGGAACCCTGGTCACCGTCTCCTCAG	CTGAGATCTGAAGACACGGCCGTCTATTATTGTGCGAGATACTGTAGTAATCCC	54	0.91852	GCGAGAGAATGTAGTAATCCCAGCTGCTATGACAAGTGGTTCGACCCC
