# Supplementary figures and images for: Broadly neutralizing human antibodies against dengue virus identified by single B cell transcriptomics
Source: eLife journal article supplement (doi:10.7554/elife.52384), 2019-12-10

**Figure 7 - figure supplement 1**

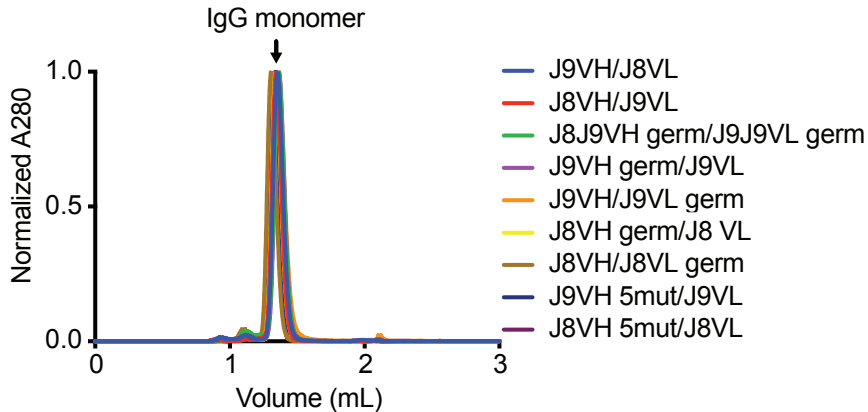

Supplement: supp [file elife-52384-supp-v1.zip]

Figure 6 - figure supplement 1

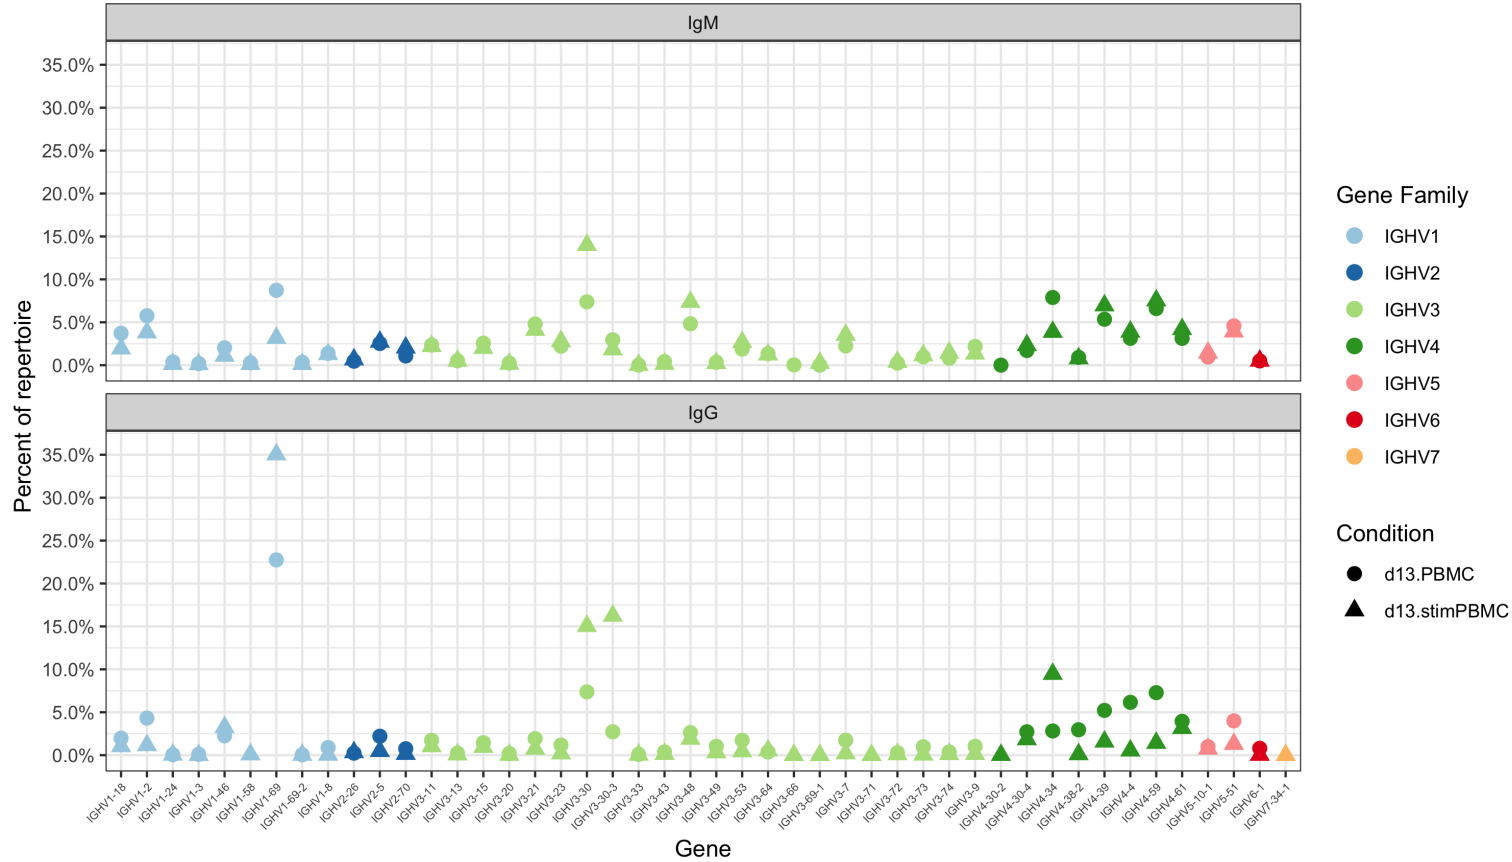

Supplement: supp [file elife-52384-supp-v1.zip]

Figure 5 - figure supplement 1

A

[illegible]

B

C

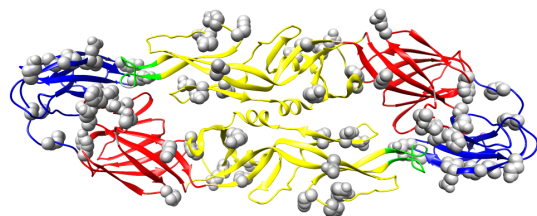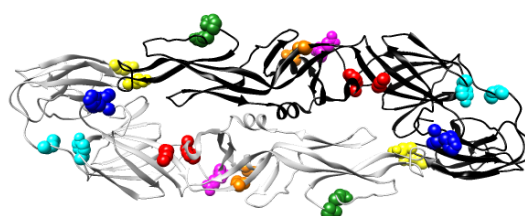

Supplement: supp [file elife-52384-supp-v1.zip]

Figure 5 - figure supplement 4

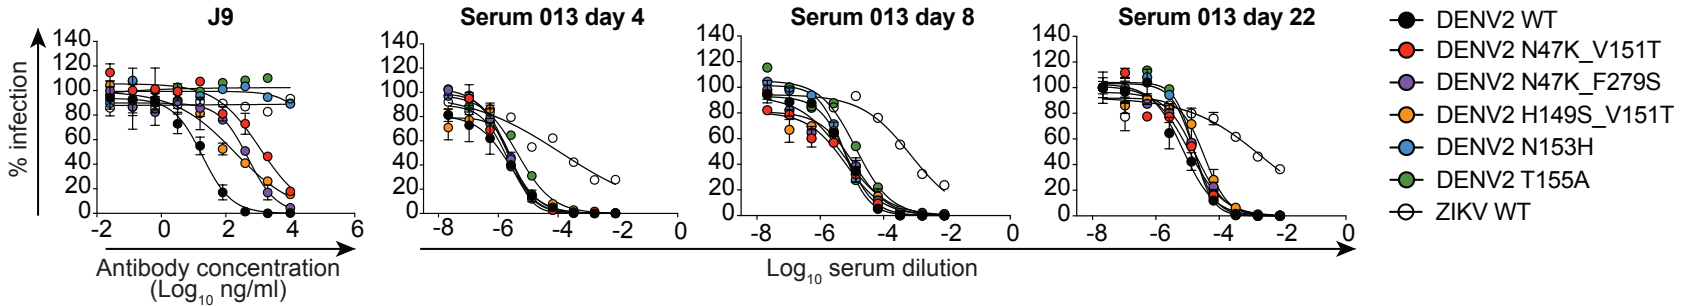

Supplement: supp [file elife-52384-supp-v1.zip]

Figure 5 - figure supplement 2

A

DENV2 E single mutants

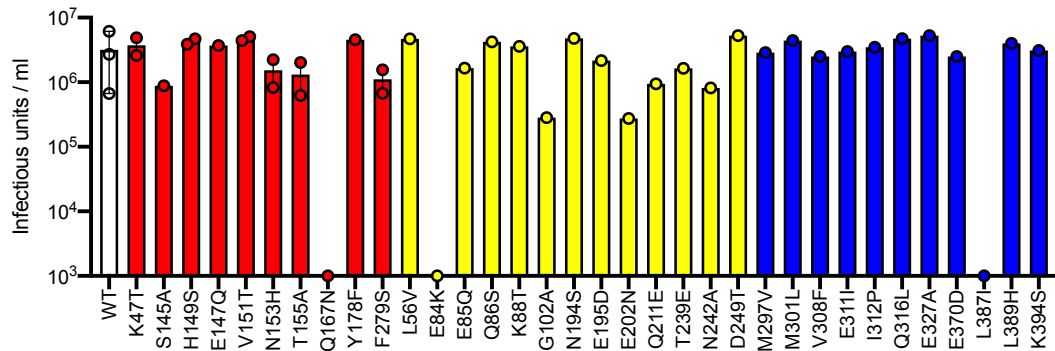

B

DENV2 E double mutants

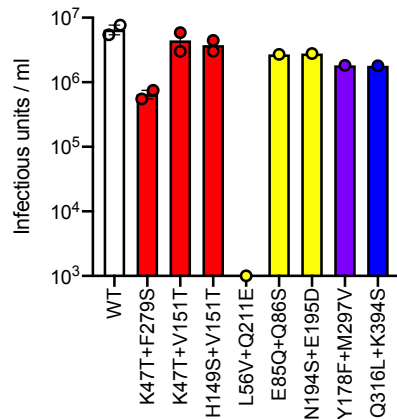

Supplement: supp [file elife-52384-supp-v1.zip]

**Figure 5 - figure supplement 3**

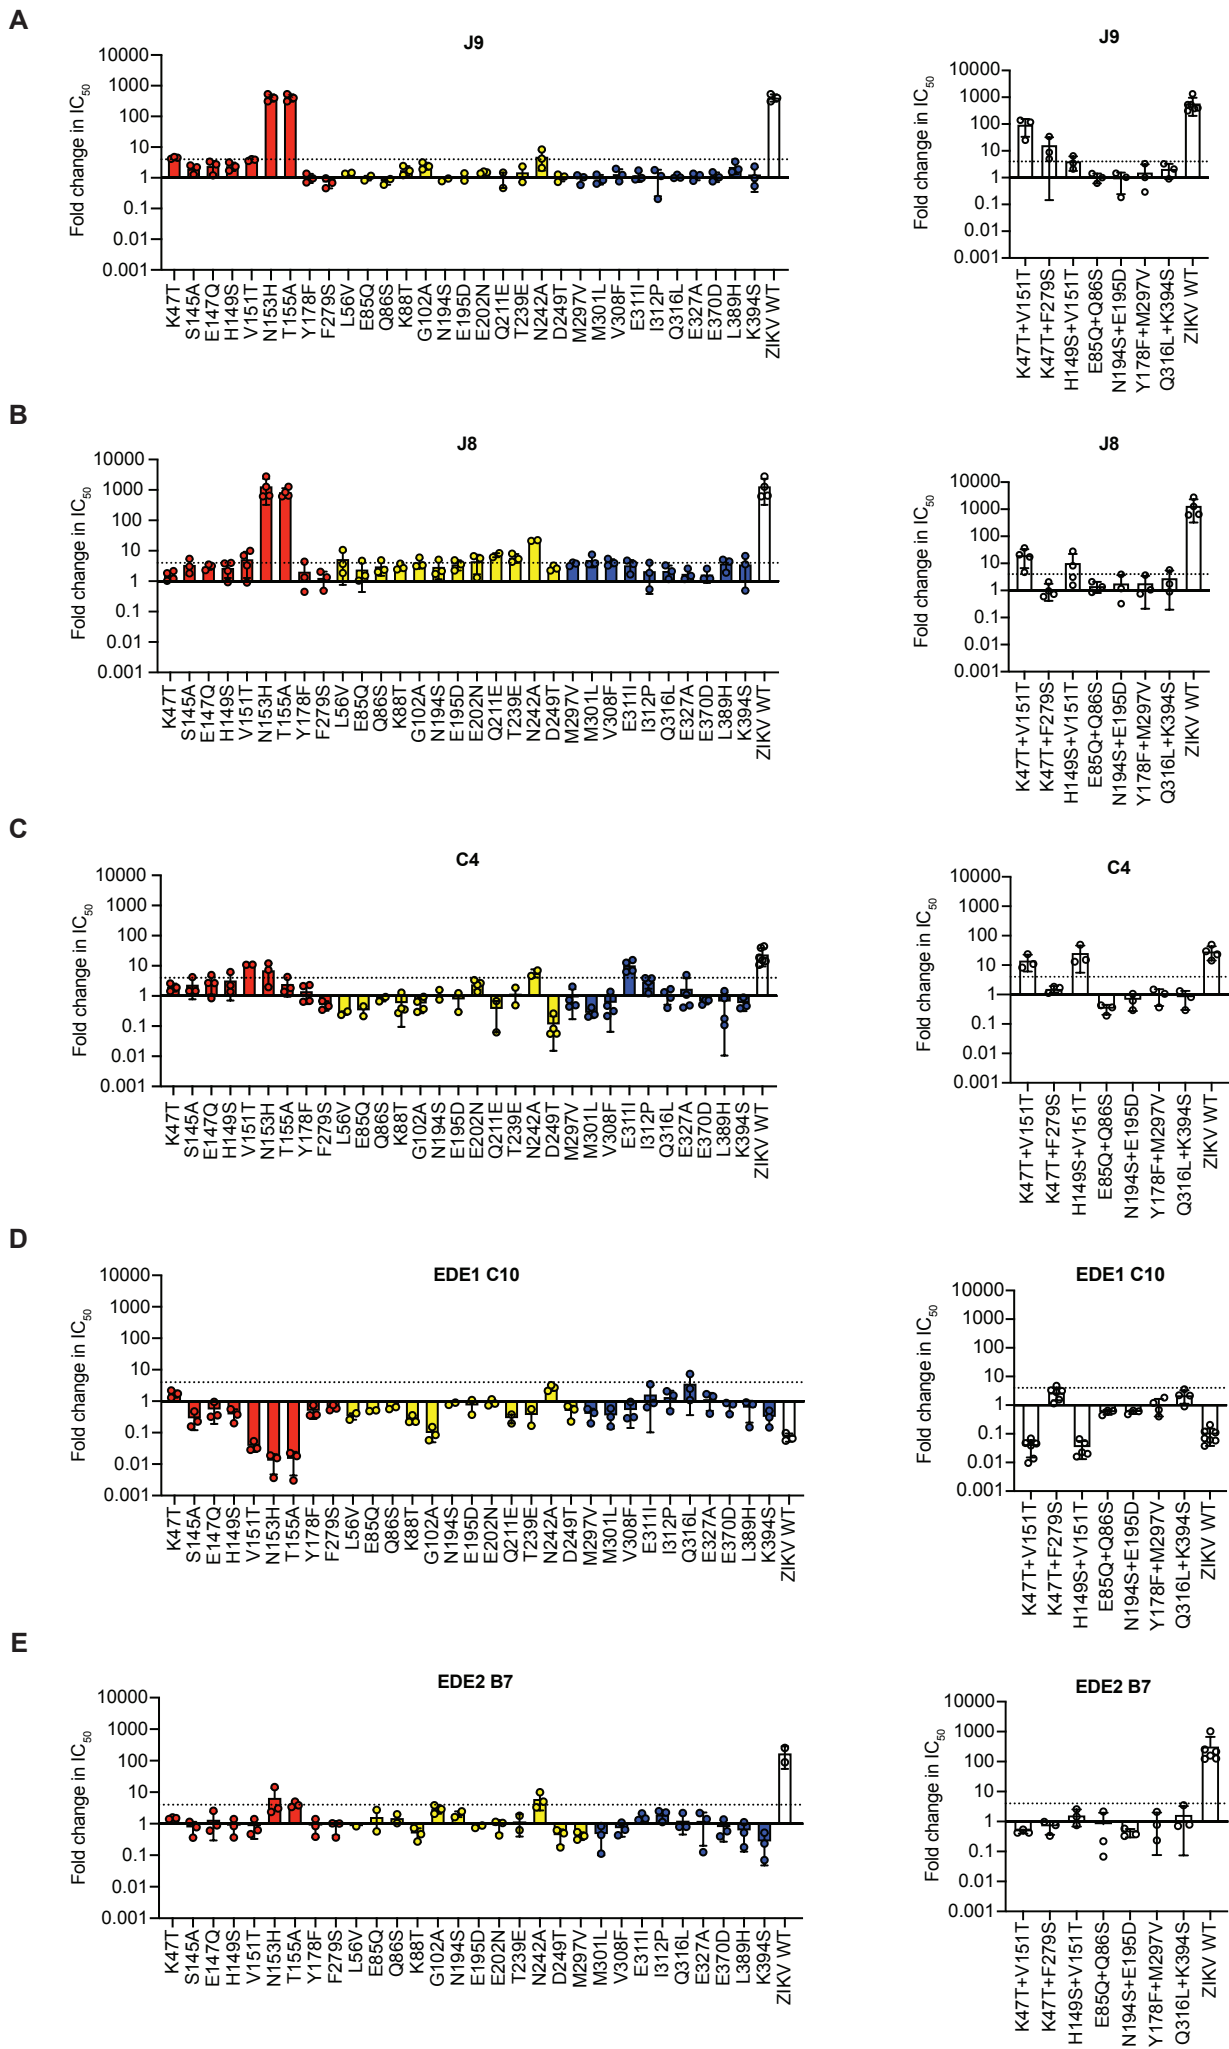

Supplement: supp [file elife-52384-supp-v1.zip]

Figure 2 - figure supplement 4

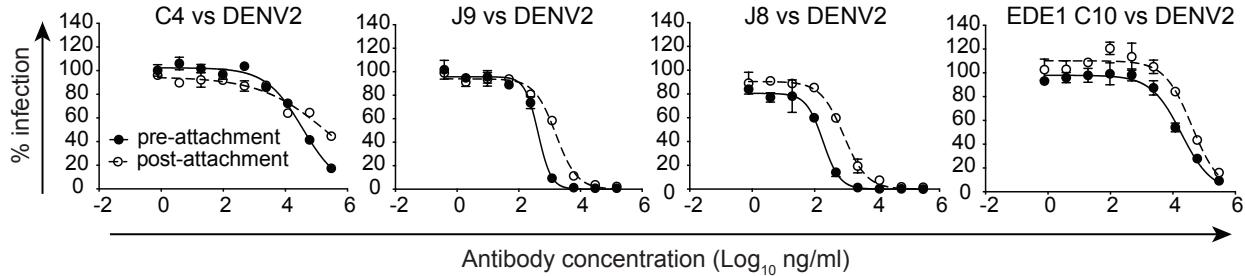

Supplement: supp [file elife-52384-supp-v1.zip › elife_poa_e52384_Figure_2_figure_supplement_4.pdf]

**Figure 2 - figure supplement 1**

**A**

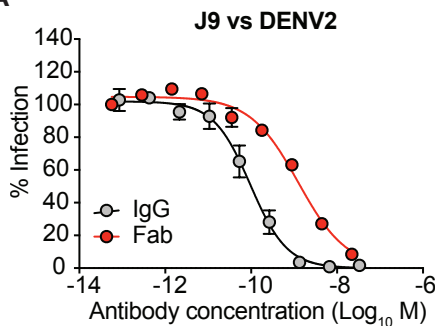

**B**

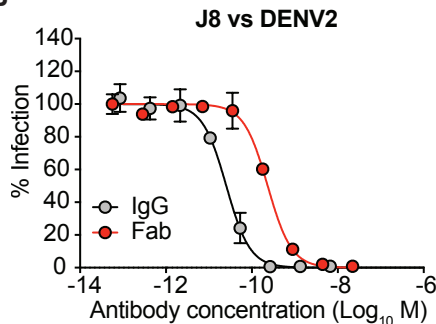

**C**

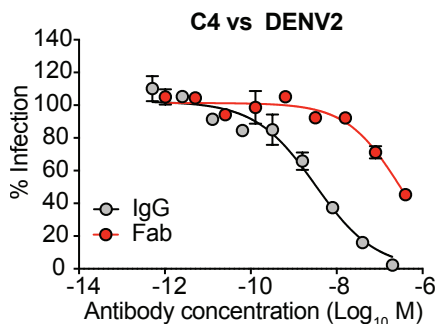

**D**

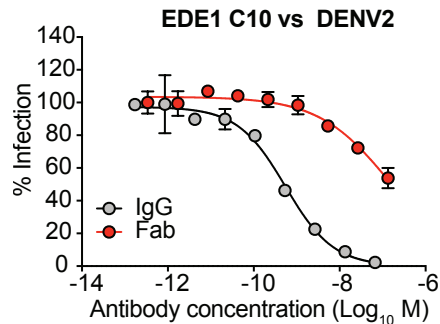

**E**

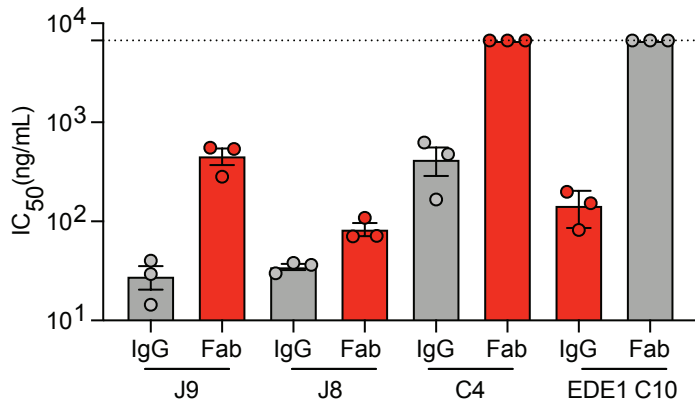

Supplement: supp [file elife-52384-supp-v1.zip › elife_poa_e52384_Figure_2_figure_supplement_1.pdf]

**Figure 3 - figure supplement 1**

**A**

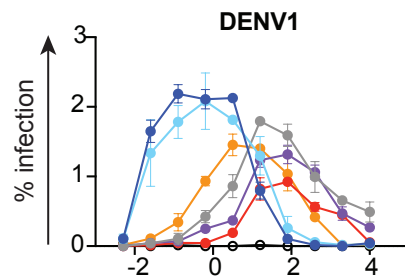

**B**

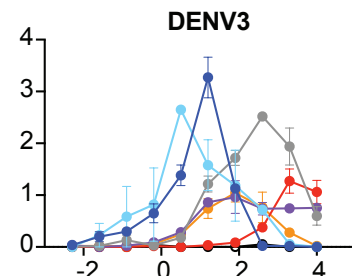

**C**

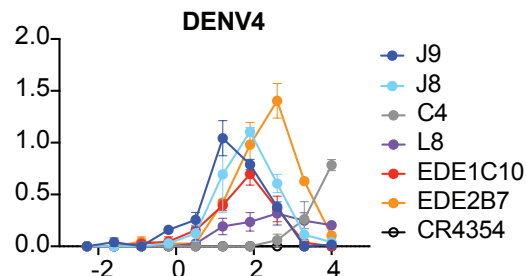

**D**

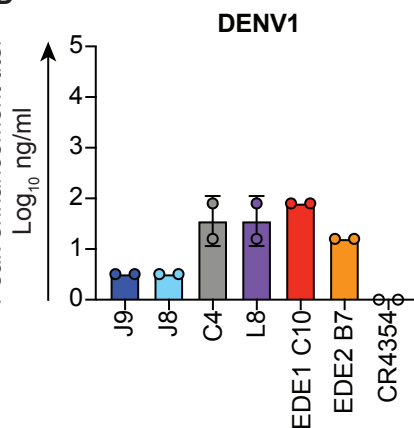

**E**

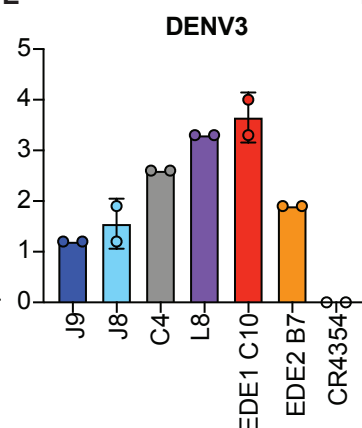

**F**

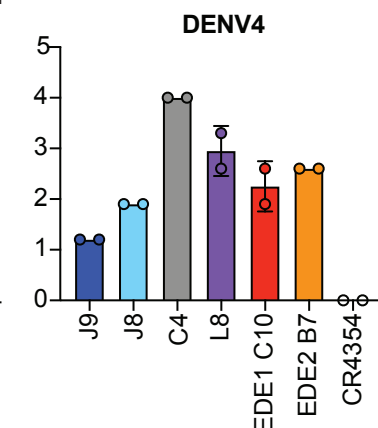

Supplement: supp [file elife-52384-supp-v1.zip › elife_poa_e52384_Figure_3_figure_supplement_1.pdf]

**Figure 2 - figure supplement 3**

**A**

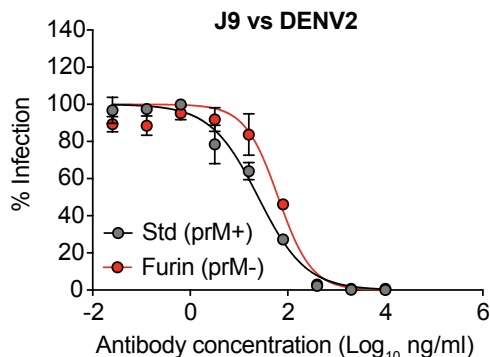

**B**

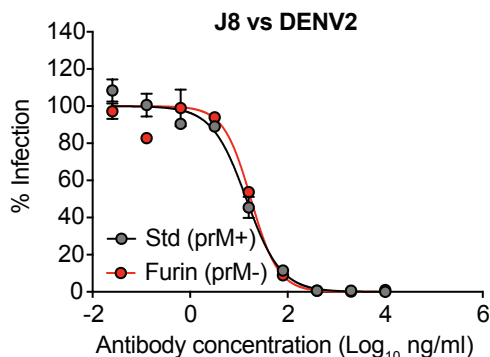

**C**

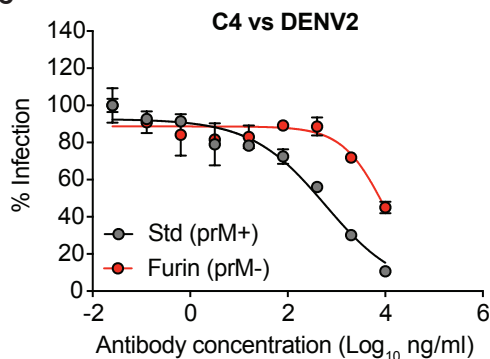

**D**

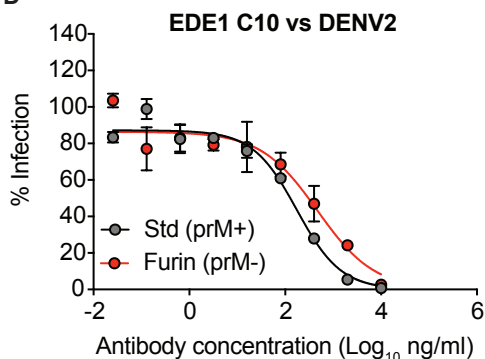

**E**

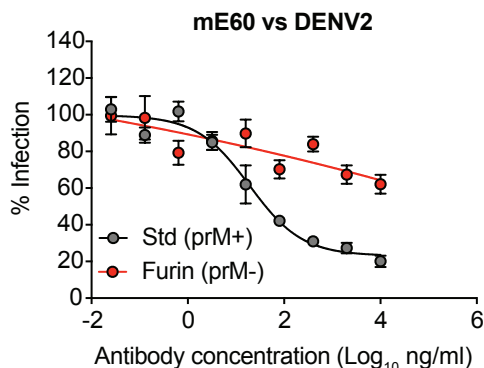

**F**

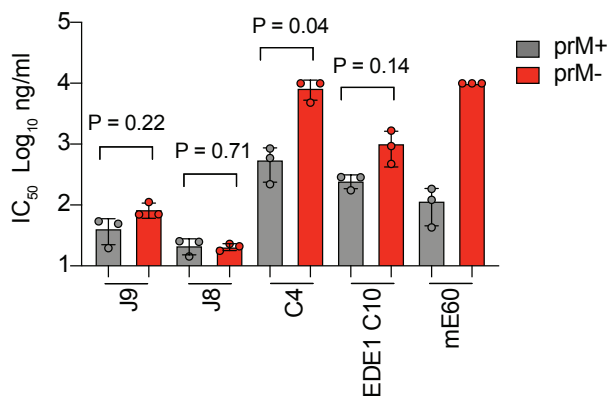

Supplement: supp [file elife-52384-supp-v1.zip › elife_poa_e52384_Figure_2_figure_supplement_3.pdf]
